# Supplementary material
Source: HighWire-hosted journal article supplement (https://www.cmajopen.ca/highwire/filestream/81253/field_highwire_adjunct_files/1/2018-0062-2-_at.pdf)
Supplement: 2018-0062-2-_at.pdf [file 2018-0062-2-_at.pdf]

Appendix 2 (as supplied by the authors): Harmonization potential of the Health and Risk Factor Questionnaire variables (Version 2.0 - Oct. 2017)

| Variable                                                           | label                                                                                         | ATL-1 | ATL-2 | ATP-1 | ATP-2 | BCGP-1 | BCGP-2 | BCGP-3 | CAG-1 | CAG-2 | OHS-1 | OHS-2 | OHS-3 | Variable with a complete status n (%) |  |
|--------------------------------------------------------------------|-----------------------------------------------------------------------------------------------|-------|-------|-------|-------|--------|--------|--------|-------|-------|-------|-------|-------|---------------------------------------|--|
| <b>Sociodemographic economic characteristics-Ethnicity</b>         |                                                                                               |       |       |       |       |        |        |        |       |       |       |       |       |                                       |  |
| SDC_EB_ABORIGINAL                                                  | Participant's ethnic background is Aboriginal (e.g. First Nations, Metis, Inuit).             | C     | C     | I     | C     | C      | C      | C      | C     | C     | C     | C     | C     | 11 (91.7%)                            |  |
| SDC_EB_ARAB                                                        | Participant's ethnic background is Arab (e.g. Egypt, Iraq, Jordan, Lebanon).                  | C     | C     | I     | C     | C      | C      | C      | C     | C     | C     | C     | C     | 11 (91.7%)                            |  |
| SDC_EB_BLACK                                                       | Participant's ethnic background is Black (African or Caribbean descent).                      | C     | C     | I     | C     | C      | C      | C      | C     | C     | C     | C     | C     | 11 (91.7%)                            |  |
| SDC_EB_E_ASIAN                                                     | Participant's ethnic background is East Asian (e.g. China, Japan, Korea, Taiwan).             | C     | C     | I     | C     | C      | C      | C      | C     | C     | C     | C     | C     | 11 (91.7%)                            |  |
| SDC_EB_FILIPINO                                                    | Participant's ethnic background is Filipino.                                                  | C     | C     | I     | C     | C      | C      | C      | C     | C     | C     | C     | C     | 11 (91.7%)                            |  |
| SDC_EB_JEWISH                                                      | Participant's ethnic background is Jewish.                                                    | C     | C     | I     | C     | C      | C      | C      | C     | C     | C     | C     | C     | 11 (91.7%)                            |  |
| SDC_EB_LATIN                                                       | Participant's ethnic background is Latin American/Hispanic).                                  | C     | C     | I     | C     | C      | C      | C      | C     | C     | C     | C     | C     | 11 (91.7%)                            |  |
| SDC_EB_OTHER                                                       | Participant has another ethnic background.                                                    | C     | C     | I     | C     | C      | C      | C      | C     | C     | C     | C     | C     | 11 (91.7%)                            |  |
| SDC_EB_SE_ASIAN                                                    | Participant's ethnic background is Southeast Asian (e.g. Malaysia, Indonesia, Viet Nam).      | C     | C     | I     | C     | C      | C      | C      | C     | C     | C     | C     | C     | 11 (91.7%)                            |  |
| SDC_EB_S_ASIAN                                                     | Participant's ethnic background is South Asian (e.g. India, Sri Lanka, Pakistan, Bangladesh). | C     | C     | I     | C     | C      | C      | C      | C     | C     | C     | C     | C     | 11 (91.7%)                            |  |
| SDC_EB_WHITE                                                       | Participant's ethnic background is White (European descent).                                  | C     | C     | I     | C     | C      | C      | C      | C     | C     | C     | C     | C     | 11 (91.7%)                            |  |
| SDC_EB_W_ASIAN                                                     | Participant's ethnic background is West Asian (e.g. Turkey, Iran, Afghanistan).               | C     | C     | I     | C     | C      | C      | C      | C     | C     | C     | C     | C     | 11 (91.7%)                            |  |
| SDC_EB_CAT                                                         | Participant's ethnic background                                                               | C     | C     | I     | C     | C      | C      | C      | C     | C     | C     | C     | C     | 11 (91.7%)                            |  |
| SDC_EB_F_CAT                                                       | Father's ethnic background                                                                    | I     | C     | I     | C     | I      | C      | I      | C     | C     | C     | C     | I     | 7 (58.3%)                             |  |
| SDC_EB_M_CAT                                                       | Mother's ethnic background                                                                    | I     | C     | I     | C     | I      | C      | I      | C     | C     | C     | C     | I     | 7 (58.3%)                             |  |
| <b>Sociodemographic economic characteristics-Language</b>          |                                                                                               |       |       |       |       |        |        |        |       |       |       |       |       |                                       |  |
| SDC_LANG_ABORIGINAL                                                | Language first learned - Aboriginal language(s)                                               | C     | C     | C     | C     | C      | C      | C      | C     | C     | C     | C     | C     | 12 (100%)                             |  |
| SDC_LANG_ARABIC                                                    | Language first learned - Arabic                                                               | C     | C     | C     | C     | C      | C      | C      | C     | C     | C     | C     | C     | 12 (100%)                             |  |
| SDC_LANG_BENGALI                                                   | Language first learned - Bengali                                                              | C     | C     | C     | C     | C      | C      | C      | C     | C     | C     | C     | C     | 12 (100%)                             |  |
| SDC_LANG_CANTONESE                                                 | Language first learned - Cantonese                                                            | C     | C     | C     | C     | C      | C      | C      | C     | C     | C     | C     | C     | 12 (100%)                             |  |
| SDC_LANG_DANISH                                                    | Language first learned - Danish                                                               | C     | C     | C     | C     | C      | C      | C      | C     | C     | C     | C     | C     | 12 (100%)                             |  |
| SDC_LANG_DUTCH                                                     | Language first learned - Dutch                                                                | C     | C     | C     | C     | C      | C      | C      | C     | C     | C     | C     | C     | 12 (100%)                             |  |
| SDC_LANG_ENGLISH                                                   | Language first learned - English                                                              | C     | C     | C     | C     | C      | C      | C      | C     | C     | C     | C     | C     | 12 (100%)                             |  |
| SDC_LANG_FARSI_PERSIAN                                             | Language first learned - Farsi/Persian                                                        | C     | C     | C     | C     | C      | C      | C      | C     | C     | C     | C     | C     | 12 (100%)                             |  |
| SDC_LANG_FINNISH                                                   | Language first learned - Finnish                                                              | C     | C     | C     | C     | C      | C      | C      | C     | C     | C     | C     | C     | 12 (100%)                             |  |
| SDC_LANG_FRENCH                                                    | Language first learned - French                                                               | C     | C     | C     | C     | C      | C      | C      | C     | C     | C     | C     | C     | 12 (100%)                             |  |
| SDC_LANG_GAELIC                                                    | Language first learned - Gaelic                                                               | C     | C     | C     | C     | C      | C      | C      | C     | C     | C     | C     | C     | 12 (100%)                             |  |
| SDC_LANG_GERMAN                                                    | Language first learned - German                                                               | C     | C     | C     | C     | C      | C      | C      | C     | C     | C     | C     | C     | 12 (100%)                             |  |
| SDC_LANG_GREEK                                                     | Language first learned - Greek                                                                | C     | C     | C     | C     | C      | C      | C      | C     | C     | C     | C     | C     | 12 (100%)                             |  |
| SDC_LANG_HINDI                                                     | Language first learned - Hindi                                                                | C     | C     | C     | C     | C      | C      | C      | C     | C     | C     | C     | C     | 12 (100%)                             |  |
| SDC_LANG_HUNGARIAN                                                 | Language first learned - Hungarian                                                            | C     | C     | C     | C     | C      | C      | C      | C     | C     | C     | C     | C     | 12 (100%)                             |  |
| SDC_LANG_ICELANDIC                                                 | Language first learned - Icelandic                                                            | C     | C     | C     | C     | C      | C      | C      | C     | C     | C     | C     | C     | 12 (100%)                             |  |
| SDC_LANG_ITALIAN                                                   | Language first learned - Italian                                                              | C     | C     | C     | C     | C      | C      | C      | C     | C     | C     | C     | C     | 12 (100%)                             |  |
| SDC_LANG_KOREAN                                                    | Language first learned - Korean                                                               | C     | C     | C     | C     | C      | C      | C      | C     | C     | C     | C     | C     | 12 (100%)                             |  |
| SDC_LANG_MANDARIN                                                  | Language first learned - Mandarin                                                             | C     | C     | C     | C     | C      | C      | C      | C     | C     | C     | C     | C     | 12 (100%)                             |  |
| SDC_LANG_NORWEGIAN                                                 | Language first learned - Norwegian                                                            | C     | C     | C     | C     | C      | C      | C      | C     | C     | C     | C     | C     | 12 (100%)                             |  |
| SDC_LANG_OTHER                                                     | Language first learned - Other                                                                | C     | C     | C     | C     | C      | C      | C      | C     | C     | C     | C     | C     | 12 (100%)                             |  |
| SDC_LANG_OTSP                                                      | Language first learned, Other specify                                                         | C     | C     | C     | C     | C      | C      | I      | I     | C     | C     | C     | C     | 10 (83.3%)                            |  |
| SDC_LANG_POLISH                                                    | Language first learned - Polish                                                               | C     | C     | C     | C     | C      | C      | C      | C     | C     | C     | C     | C     | 12 (100%)                             |  |
| SDC_LANG_PORTUGUESE                                                | Language first learned - Portuguese                                                           | C     | C     | C     | C     | C      | C      | C      | C     | C     | C     | C     | C     | 12 (100%)                             |  |
| SDC_LANG_PUNJABI                                                   | Language first learned - Punjabi                                                              | C     | C     | C     | C     | C      | C      | C      | C     | C     | C     | C     | C     | 12 (100%)                             |  |
| SDC_LANG_RUSSIAN                                                   | Language first learned - Russian                                                              | C     | C     | C     | C     | C      | C      | C      | C     | C     | C     | C     | C     | 12 (100%)                             |  |
| SDC_LANG_SPANISH                                                   | Language first learned - Spanish                                                              | C     | C     | C     | C     | C      | C      | C      | C     | C     | C     | C     | C     | 12 (100%)                             |  |
| SDC_LANG_SWEDISH                                                   | Language first learned - Swedish                                                              | C     | C     | C     | C     | C      | C      | C      | C     | C     | C     | C     | C     | 12 (100%)                             |  |
| SDC_LANG_TAGALOG_FILIPINO                                          | Language first learned - Tagalog/Filipino                                                     | C     | C     | C     | C     | C      | C      | C      | C     | C     | C     | C     | C     | 12 (100%)                             |  |
| SDC_LANG_TAMIL                                                     | Language first learned - Tamil                                                                | C     | C     | C     | C     | C      | C      | C      | C     | C     | C     | C     | C     | 12 (100%)                             |  |
| SDC_LANG_UKRAINIAN                                                 | Language first learned - Ukrainian                                                            | C     | C     | C     | C     | C      | C      | C      | C     | C     | C     | C     | C     | 12 (100%)                             |  |
| SDC_LANG_URDU                                                      | Language first learned - Urdu                                                                 | C     | C     | C     | C     | C      | C      | C      | C     | C     | C     | C     | C     | 12 (100%)                             |  |
| SDC_LANG_VIETNAMESE                                                | Language first learned - Vietnamese                                                           | C     | C     | C     | C     | C      | C      | C      | C     | C     | C     | C     | C     | 12 (100%)                             |  |
| SDC_LANG_WELSH                                                     | Language first learned - Welsh                                                                | C     | C     | C     | C     | C      | C      | C      | C     | C     | C     | C     | C     | 12 (100%)                             |  |
| <b>Sociodemographic economic characteristics-Labour retirement</b> |                                                                                               |       |       |       |       |        |        |        |       |       |       |       |       |                                       |  |
| WRK_EMPLOYMENT                                                     | Employment status                                                                             | C     | C     | C     | C     | C      | C      | C      | C     | C     | C     | C     | C     | 12 (100%)                             |  |
| WRK_FULL_TIME                                                      | Full-time employed                                                                            | C     | C     | C     | C     | C      | C      | C      | C     | C     | C     | C     | C     | 12 (100%)                             |  |
| WRK_HOME_FAMILY                                                    | Looking after home/family                                                                     | C     | C     | C     | C     | C      | C      | C      | C     | C     | C     | C     | C     | 12 (100%)                             |  |
| WRK_IND_TYPE_CUR_CAT                                               | Current type of industry - categorical                                                        | I     | C     | C     | I     | I      | I      | I      | C     | I     | I     | I     | I     | 3 (25%)                               |  |
| WRK_IND_TYPE_CUR_OPEN                                              | Current type of industry - open text                                                          | C     | I     | I     | C     | C      | C      | I      | I     | C     | C     | C     | I     | 7 (58.3%)                             |  |
| WRK_IND_TYPE_LONGEST_CAT                                           | Type of industry for occupation of longest duration - categorical                             | I     | I     | C     | I     | I      | I      | I      | C     | I     | I     | I     | I     | 2 (16.7%)                             |  |
| WRK_IND_TYPE_LONGEST_OPEN                                          | Type of industry for occupation of longest duration - open text                               | C     | I     | I     | C     | C      | C      | I      | I     | C     | C     | C     | I     | 7 (58.3%)                             |  |
| WRK_JOB_AGE_CUR                                                    | Age started current job                                                                       | C     | I     | C     | C     | C      | C      | I      | C     | C     | C     | C     | I     | 9 (75%)                               |  |

Appendix 2 (as supplied by the authors): Harmonization potential of the Health and Risk Factor Questionnaire variables (Version 2.0 - Oct. 2017)

| Variable                                                                        | label                                                            | ATL-1 | ATL-2 | ATP-1 | ATP-2 | BCGP-1 | BCGP-2 | BCGP-3 | CAG-1 | CAG-2 | OHS-1 | OHS-2 | OHS-3 | Variable with a complete status n (%) |
|---------------------------------------------------------------------------------|------------------------------------------------------------------|-------|-------|-------|-------|--------|--------|--------|-------|-------|-------|-------|-------|---------------------------------------|
| WRK_JOB_CUR_LONGEST                                                             | Current occupation held for longest duration                     | C     | I     | C     | C     | C      | C      | I      | C     | C     | C     | C     | I     | 9 (75%)                               |
| WRK_JOB_LONGEST_AGE_START                                                       | Age started job of longest duration                              | I     | I     | C     | I     | I      | I      | I      | C     | C     | I     | I     | I     | 3 (25%)                               |
| WRK_JOB_LONGEST_AGE_STOP                                                        | Age stopped job of longest duration                              | I     | I     | C     | I     | I      | I      | I      | C     | C     | I     | I     | I     | 3 (25%)                               |
| WRK_JOB_TITLE_CUR_OPEN                                                          | Current job title - open text                                    | C     | C     | C     | C     | C      | C      | C      | C     | C     | C     | C     | C     | 12 (100%)                             |
| WRK_JOB_TITLE_LONGEST_OPEN                                                      | Job title for occupation of longest duration - open text         | C     | I     | C     | C     | C      | C      | I      | I     | I     | C     | C     | I     | 7 (58.3%)                             |
| WRK_JOB_TYPE_CUR_CAT                                                            | Current type of job - categorical                                | I     | I     | I     | I     | I      | I      | C      | C     | C     | I     | I     | C     | 4 (33.3%)                             |
| WRK_JOB_TYPE_LONGEST_CAT                                                        | Type of job held for longest duration - categorical              | I     | I     | I     | I     | I      | I      | C      | C     | C     | I     | I     | I     | 2 (16.7%)                             |
| WRK_PART_TIME                                                                   | Part-time employed                                               | C     | C     | C     | C     | C      | C      | C      | C     | C     | C     | C     | C     | 12 (100%)                             |
| WRK_RETIREMENT                                                                  | Retired                                                          | C     | C     | C     | C     | C      | C      | C      | C     | C     | C     | C     | C     | 12 (100%)                             |
| WRK_SCHEDULE_CUR_CAT                                                            | Current working schedule                                         | C     | C     | C     | C     | C      | C      | C      | C     | C     | C     | C     | C     | 12 (100%)                             |
| WRK_SCHEDULE_CUR_OTSP                                                           | Current working schedule, other specify                          | C     | C     | C     | C     | C      | C      | C      | I     | I     | C     | C     | C     | 10 (83.3%)                            |
| WRK_SCHEDULE_LONGEST_CAT                                                        | Working schedule for occupation held longest time                | C     | I     | C     | C     | C      | C      | I      | C     | C     | C     | C     | I     | 9 (75%)                               |
| WRK_SCHEDULE_LONGEST_OTSP                                                       | Working schedule for occupation held longest time, other specify | C     | I     | C     | C     | C      | C      | I      | I     | I     | C     | C     | I     | 7 (58.3%)                             |
| WRK_STUDENT                                                                     | Student                                                          | C     | C     | C     | C     | C      | C      | C      | C     | C     | C     | C     | C     | 12 (100%)                             |
| WRK_UNABLE                                                                      | Unable to work                                                   | C     | C     | C     | C     | C      | C      | C      | C     | C     | C     | C     | C     | 12 (100%)                             |
| WRK_UNEMPLOYED                                                                  | Unemployed                                                       | C     | C     | C     | C     | C      | C      | C      | C     | C     | C     | C     | C     | 12 (100%)                             |
| WRK_UNPAID                                                                      | Doing unpaid work                                                | C     | C     | C     | C     | C      | C      | C      | C     | C     | C     | C     | C     | 12 (100%)                             |
| <b>Sociodemographic economic characteristics-Birth place</b>                    |                                                                  |       |       |       |       |        |        |        |       |       |       |       |       |                                       |
| SDC_BIRTH_COUNTRY                                                               | Participant's country of birth                                   | C     | C     | C     | C     | C      | C      | C      | C     | C     | C     | C     | C     | 12 (100%)                             |
| SDC_BIRTH_COUNTRY_F                                                             | Father's country of birth                                        | C     | C     | C     | C     | C      | C      | C      | C     | C     | C     | C     | C     | 12 (100%)                             |
| SDC_BIRTH_COUNTRY_FF                                                            | Paternal grandfather's country of birth                          | C     | C     | I     | C     | C      | C      | I      | C     | C     | C     | C     | C     | 10 (83.3%)                            |
| SDC_BIRTH_COUNTRY_FF_OTSP                                                       | Paternal grandfather's country of birth, other specify           | C     | C     | I     | C     | C      | C      | I      | C     | C     | C     | C     | C     | 10 (83.3%)                            |
| SDC_BIRTH_COUNTRY_FM                                                            | Paternal grandmother's country of birth                          | C     | C     | I     | C     | C      | C      | I      | C     | C     | C     | C     | C     | 10 (83.3%)                            |
| SDC_BIRTH_COUNTRY_FM_OTSP                                                       | Paternal grandmother's country of birth, other specify           | C     | C     | I     | C     | C      | C      | I      | C     | C     | C     | C     | C     | 10 (83.3%)                            |
| SDC_BIRTH_COUNTRY_F_OTSP                                                        | Father's country of birth, other specify                         | C     | C     | C     | C     | C      | C      | C      | C     | C     | C     | C     | C     | 12 (100%)                             |
| SDC_BIRTH_COUNTRY_M                                                             | Mother's country of birth                                        | C     | C     | C     | C     | C      | C      | C      | C     | C     | C     | C     | C     | 12 (100%)                             |
| SDC_BIRTH_COUNTRY_MF                                                            | Maternal grandfather's country of birth                          | C     | C     | I     | C     | C      | C      | I      | C     | C     | C     | C     | C     | 10 (83.3%)                            |
| SDC_BIRTH_COUNTRY_MF_OTSP                                                       | Maternal grandfather's country of birth, other specify           | C     | C     | I     | C     | C      | C      | I      | C     | C     | C     | C     | C     | 10 (83.3%)                            |
| SDC_BIRTH_COUNTRY_MM                                                            | Maternal grandmother's country of birth                          | C     | C     | I     | C     | C      | C      | I      | C     | C     | C     | C     | C     | 10 (83.3%)                            |
| SDC_BIRTH_COUNTRY_MM_OTSP                                                       | Maternal grandmother's country of birth, other specify           | C     | C     | I     | C     | C      | C      | I      | C     | C     | C     | C     | C     | 10 (83.3%)                            |
| SDC_BIRTH_COUNTRY_M_OTSP                                                        | Mother's country of birth, other specify                         | C     | C     | C     | C     | C      | C      | C      | C     | C     | C     | C     | C     | 12 (100%)                             |
| SDC_BIRTH_COUNTRY_OTSP                                                          | Participant's country of birth, other specify                    | C     | C     | C     | C     | C      | C      | C      | C     | C     | C     | C     | C     | 12 (100%)                             |
| <b>Sociodemographic economic characteristics-Family and household structure</b> |                                                                  |       |       |       |       |        |        |        |       |       |       |       |       |                                       |
| SDC_BROTHERS_NB                                                                 | Number of biological brothers                                    | C     | C     | I     | C     | C      | C      | C      | I     | I     | C     | C     | C     | 9 (75%)                               |
| SDC_HOUSEHOLD_ADULTS_NB                                                         | Number of adults in the household                                | C     | C     | C     | C     | C      | C      | C      | C     | C     | I     | C     | C     | 11 (91.7%)                            |
| SDC_HOUSEHOLD_ADULTS_NB_CAT                                                     | Number of adults in the household - categorical                  | C     | C     | C     | C     | C      | C      | C      | C     | C     | C     | C     | C     | 12 (100%)                             |
| SDC_HOUSEHOLD_CHILDREN_NB                                                       | Number of children in the household                              | C     | C     | C     | C     | C      | C      | C      | C     | I     | C     | C     | C     | 11 (91.7%)                            |
| SDC_HOUSEHOLD_CHILDREN_NB_CAT                                                   | Number of children in the household - categorical                | C     | C     | C     | C     | C      | C      | C      | C     | C     | C     | C     | C     | 12 (100%)                             |
| SDC_SIB_NB                                                                      | Number of biological siblings                                    | C     | C     | C     | C     | C      | C      | C      | C     | I     | C     | C     | C     | 11 (91.7%)                            |
| SDC_SIB_NB_CAT                                                                  | Number of biological siblings - categorical                      | C     | C     | C     | C     | C      | C      | C      | C     | C     | C     | C     | C     | 12 (100%)                             |
| SDC_SIB_OLDER_NB                                                                | Number of siblings older than participant                        | C     | C     | C     | C     | C      | C      | C      | C     | I     | C     | C     | C     | 11 (91.7%)                            |
| SDC_SIB_OLDER_NB_CAT                                                            | Number of siblings older than participant - categorical          | C     | C     | C     | C     | C      | C      | C      | C     | C     | C     | C     | C     | 12 (100%)                             |
| SDC_SISTERS_NB                                                                  | Number of biological sisters                                     | C     | C     | I     | C     | C      | C      | C      | I     | I     | C     | C     | C     | 9 (75%)                               |
| <b>Sociodemographic economic characteristics-Possession and benefits</b>        |                                                                  |       |       |       |       |        |        |        |       |       |       |       |       |                                       |
| SDC_INCOME                                                                      | Household income before taxes                                    | C     | C     | C     | C     | C      | C      | C      | C     | C     | C     | C     | C     | 12 (100%)                             |
| SDC_INCOME_IND_NB                                                               | Number of individuals supported by income                        | C     | C     | C     | C     | C      | C      | C      | C     | I     | C     | C     | C     | 11 (91.7%)                            |
| SDC_INCOME_IND_NB_CAT                                                           | Number of individuals supported by income - categorical          | C     | C     | C     | C     | C      | C      | C      | C     | C     | C     | C     | C     | 12 (100%)                             |
| <b>Sociodemographic economic characteristics-Education</b>                      |                                                                  |       |       |       |       |        |        |        |       |       |       |       |       |                                       |
| SDC_EDU_LEVEL                                                                   | Highest level of education completed                             | C     | C     | C     | C     | C      | C      | C      | C     | C     | C     | C     | C     | 12 (100%)                             |
| SDC_EDU_LEVEL_AGE                                                               | Age highest level education completed                            | C     | C     | C     | C     | C      | C      | C      | C     | C     | C     | C     | C     | 12 (100%)                             |
| <b>Sociodemographic economic characteristics-Age</b>                            |                                                                  |       |       |       |       |        |        |        |       |       |       |       |       |                                       |
| SDC_AGE_CALC                                                                    | Age                                                              | C     | C     | C     | C     | C      | C      | C      | C     | C     | C     | C     | C     | 12 (100%)                             |
| <b>Sociodemographic economic characteristics-Marital status</b>                 |                                                                  |       |       |       |       |        |        |        |       |       |       |       |       |                                       |
| SDC_MARITAL_STATUS                                                              | Marital status                                                   | C     | C     | C     | C     | C      | C      | C      | C     | C     | C     | C     | C     | 12 (100%)                             |
| <b>Sociodemographic economic characteristics-Other sociodemographic</b>         |                                                                  |       |       |       |       |        |        |        |       |       |       |       |       |                                       |
| SDC_ADOPTED_CHILD                                                               | Adopted                                                          | C     | C     | C     | C     | C      | C      | C      | C     | C     | C     | C     | C     | 12 (100%)                             |
| <b>Sociodemographic economic characteristics-Residence</b>                      |                                                                  |       |       |       |       |        |        |        |       |       |       |       |       |                                       |
| SDC_ARRIVAL_AGE                                                                 | Age of arrival in Canada                                         | C     | C     | C     | C     | C      | C      | C      | C     | C     | C     | C     | C     | 12 (100%)                             |
| <b>Sociodemographic economic characteristics-Sex</b>                            |                                                                  |       |       |       |       |        |        |        |       |       |       |       |       |                                       |
| SDC_GENDER                                                                      | Gender                                                           | C     | C     | C     | C     | C      | C      | C      | C     | C     | C     | C     | C     | 12 (100%)                             |
| <b>Sociodemographic economic characteristics-Twin</b>                           |                                                                  |       |       |       |       |        |        |        |       |       |       |       |       |                                       |
| SDC_MULTIPLE_BIRTH                                                              | Child of a multiple birth                                        | C     | C     | C     | C     | C      | C      | C      | C     | C     | C     | C     | C     | 12 (100%)                             |
| <b>Lifestyle behaviours-Physical activity</b>                                   |                                                                  |       |       |       |       |        |        |        |       |       |       |       |       |                                       |
| PA_LEVEL_LONG                                                                   | Total physical activity level                                    | I     | C     | C     | I     | I      | I      | C      | C     | I     | I     | I     | C     | 5 (41.7%)                             |
| PA_LEVEL_SHORT                                                                  | Total physical activity level                                    | C     | I     | I     | C     | C      | C      | I      | C     | C     | C     | C     | I     | 8 (66.7%)                             |
| PA_SIT_AVG_TIME_DAY                                                             | Average sitting time per day                                     | C     | C     | C     | C     | C      | C      | C      | C     | I     | C     | C     | C     | 11 (91.7%)                            |
| PA_SIT_TIME_WKDAY                                                               | Average sitting time on week day                                 | C     | C     | C     | C     | C      | C      | C      | C     | C     | C     | C     | C     | 12 (100%)                             |
| PA_SIT_TIME_WKEND                                                               | Average sitting time on weekend day                              | C     | C     | C     | C     | C      | C      | C      | C     | I     | C     | C     | C     | 11 (91.7%)                            |
| PA_TOTAL_LONG                                                                   | Total physical activity MET-minutes/week                         | I     | C     | C     | I     | I      | I      | C      | C     | I     | I     | I     | C     | 5 (41.7%)                             |
| PA_TOTAL_MOD_LONG                                                               | Total moderate activities MET-minutes/week                       | I     | C     | C     | I     | I      | I      | C      | C     | I     | I     | I     | C     | 5 (41.7%)                             |
| PA_TOTAL_MOD_SHORT                                                              | Total moderate activities MET-minutes/week                       | C     | I     | I     | C     | C      | C      | I      | C     | C     | C     | C     | I     | 8 (66.7%)                             |
| PA_TOTAL_SHORT                                                                  | Total physical activity MET-minutes/week                         | C     | I     | I     | C     | C      | C      | I      | C     | C     | C     | C     | I     | 8 (66.7%)                             |

Appendix 2 (as supplied by the authors): Harmonization potential of the Health and Risk Factor Questionnaire variables (Version 2.0 - Oct. 2017)

| Variable                            | label                                                                                                         | ATL-1 | ATL-2 | ATP-1 | ATP-2 | BCGP-1 | BCGP-2 | BCGP-3 | CAG-1 | CAG-2 | OHS-1 | OHS-2 | OHS-3 | Variable with a complete status n (%) |
|-------------------------------------|---------------------------------------------------------------------------------------------------------------|-------|-------|-------|-------|--------|--------|--------|-------|-------|-------|-------|-------|---------------------------------------|
| PA_TOTAL_SIT_TIME                   | Total sitting time per week                                                                                   | C     | C     | C     | C     | C      | C      | C      | C     | I     | C     | C     | C     | 11 (91.7%)                            |
| PA_TOTAL_VIG_LONG                   | Total vigorous activities MET-minutes/week                                                                    | I     | C     | C     | I     | I      | I      | C      | C     | I     | I     | I     | C     | 5 (41.7%)                             |
| PA_TOTAL_VIG_SHORT                  | Total vigorous activities MET-minutes/week                                                                    | C     | I     | I     | C     | C      | C      | I      | C     | C     | C     | C     | I     | 8 (66.7%)                             |
| PA_TOTAL_WALK_LONG                  | Total walking MET-minutes/week                                                                                | I     | C     | C     | I     | I      | I      | C      | C     | I     | I     | I     | C     | 5 (41.7%)                             |
| PA_TOTAL_WALK_SHORT                 | Total walking MET-minutes/week                                                                                | C     | I     | I     | C     | C      | C      | I      | C     | C     | C     | C     | I     | 8 (66.7%)                             |
| <b>Lifestyle behaviours-Tobacco</b> |                                                                                                               |       |       |       |       |        |        |        |       |       |       |       |       |                                       |
| SMK_BETEL_CUR                       | Currently uses betel nut                                                                                      | C     | C     | C     | C     | C      | C      | C      | C     | C     | C     | C     | C     | 12 (100%)                             |
| SMK_BETEL_EVER                      | Ever used betel nut                                                                                           | C     | C     | C     | C     | C      | C      | C      | C     | C     | C     | C     | C     | 12 (100%)                             |
| SMK_CIGAR_CUR                       | Currently smokes cigars                                                                                       | C     | C     | C     | C     | C      | C      | C      | C     | C     | C     | C     | C     | 12 (100%)                             |
| SMK_CIGAR_EVER                      | Ever smoked cigars                                                                                            | C     | C     | C     | C     | C      | C      | C      | C     | C     | C     | C     | C     | 12 (100%)                             |
| SMK_CIG_CUR_FREQ                    | Current cigarette smoker frequency                                                                            | C     | C     | C     | C     | C      | C      | C      | C     | C     | C     | C     | C     | 12 (100%)                             |
| SMK_CIG_DAILY_AVG_QTY               | Number of cigarettes smoked over time - current daily smokers                                                 | C     | I     | I     | C     | C      | C      | I      | I     | I     | C     | C     | I     | 6 (50%)                               |
| SMK_CIG_DAILY_AVG_QTY_26            | Number of cigarettes smoked over time, if 26 or more - current daily smokers                                  | C     | I     | I     | C     | C      | C      | I      | I     | I     | C     | C     | I     | 6 (50%)                               |
| SMK_CIG_DAILY_CUR_DUR               | Duration daily cigarettes smoking - current daily smokers                                                     | C     | I     | I     | C     | C      | C      | I      | I     | I     | C     | C     | I     | 6 (50%)                               |
| SMK_CIG_DAILY_CUR_ONSET             | Age first started smoking daily - current daily smokers                                                       | C     | C     | C     | C     | C      | C      | C      | C     | C     | C     | C     | C     | 12 (100%)                             |
| SMK_CIG_DAILY_CUR_QTY               | Number of cigarettes smoked per day - current daily smokers                                                   | C     | C     | C     | C     | C      | C      | C      | C     | C     | C     | C     | C     | 12 (100%)                             |
| SMK_CIG_DAILY_CUR_QTY_26            | Number of cigarettes smoked per day if 26 or more - current daily smokers                                     | C     | C     | C     | C     | C      | C      | C      | C     | I     | C     | C     | C     | 11 (91.7%)                            |
| SMK_CIG_EVER                        | Ever smoked 100 cigarettes or more                                                                            | C     | C     | C     | C     | C      | C      | C      | C     | C     | C     | C     | C     | 12 (100%)                             |
| SMK_CIG_FORMER_DAILY                | Ever smoked cigarettes daily - current non-daily smokers                                                      | C     | C     | C     | C     | C      | C      | C      | C     | C     | C     | C     | C     | 12 (100%)                             |
| SMK_CIG_FORMER_DAILY_CESSATION      | Period since last smoked cigarettes daily - former daily smokers                                              | C     | I     | I     | C     | C      | C      | I      | I     | I     | C     | C     | I     | 6 (50%)                               |
| SMK_CIG_FORMER_DAILY_DUR            | Duration of daily cigarettes smoking - former daily smokers                                                   | C     | C     | I     | C     | C      | C      | I      | I     | I     | C     | C     | I     | 7 (58.3%)                             |
| SMK_CIG_FORMER_DAILY_ONSET          | Age started smoking cigarettes daily - former daily smokers                                                   | C     | C     | C     | C     | C      | C      | C      | C     | C     | C     | C     | C     | 12 (100%)                             |
| SMK_CIG_FORMER_DAILY_QTY            | Number of cigarettes smoked per day - former daily smokers                                                    | C     | I     | I     | C     | C      | C      | I      | I     | I     | C     | C     | I     | 6 (50%)                               |
| SMK_CIG_FORMER_DAILY_QTY_26         | Number of cigarettes smoked per day, if 26 or more - former daily smokers                                     | C     | I     | I     | C     | C      | C      | I      | I     | I     | C     | C     | I     | 6 (50%)                               |
| SMK_CIG_HEAVIEST_DUR                | Duration heaviest cigarettes consumption - current daily and former daily smokers                             | I     | C     | C     | I     | I      | I      | C      | C     | I     | I     | I     | C     | 5 (41.7%)                             |
| SMK_CIG_HEAVIEST_QTY                | Number of cigarettes smoked per day, heaviest quantity - current daily or former daily smokers                | I     | C     | C     | I     | I      | I      | C      | C     | C     | I     | I     | C     | 6 (50%)                               |
| SMK_CIG_HEAVIEST_QTY_26             | Number of cigarettes smoked per day, heaviest quantity, if 26 or more - current daily or former daily smokers | I     | C     | C     | I     | I      | I      | C      | C     | I     | I     | I     | C     | 5 (41.7%)                             |
| SMK_CIG_LAST_AGE                    | Age last smoked cigarettes on most days - current non-smokers                                                 | I     | C     | C     | I     | I      | I      | C      | C     | C     | I     | I     | C     | 6 (50%)                               |
| SMK_CIG_OCC_CUR_FREQ                | One cigarette smoked frequency - current occasional smokers                                                   | C     | I     | I     | C     | C      | C      | I      | I     | C     | C     | C     | I     | 7 (58.3%)                             |
| SMK_CIG_OCC_CUR_QTY                 | Number of cigarettes smoked per day - current occasional smokers                                              | C     | C     | C     | C     | C      | C      | C      | C     | C     | C     | C     | C     | 12 (100%)                             |
| SMK_CIG_STATUS                      | Cigarettes smoking status                                                                                     | C     | C     | C     | C     | C      | C      | C      | C     | C     | C     | C     | C     | 12 (100%)                             |
| SMK_CIG_WHOLE_EVER                  | Ever smoked a whole cigarette                                                                                 | C     | I     | I     | C     | C      | C      | I      | I     | I     | C     | C     | I     | 6 (50%)                               |
| SMK_CIG_WHOLE_ONSET                 | Age smoked a whole cigarette                                                                                  | C     | I     | I     | C     | C      | C      | I      | I     | I     | C     | C     | I     | 6 (50%)                               |
| SMK_GUM_CUR                         | Currently uses nicotine gum                                                                                   | C     | I     | I     | C     | C      | C      | I      | I     | C     | C     | C     | I     | 7 (58.3%)                             |
| SMK_GUM_EVER                        | Ever used nicotine gum                                                                                        | C     | I     | I     | C     | C      | C      | I      | I     | C     | C     | C     | I     | 7 (58.3%)                             |
| SMK_OTHER_TOB_CUR                   | Currently uses other types of tobacco or nicotine products                                                    | C     | C     | C     | C     | C      | C      | C      | C     | C     | C     | C     | C     | 12 (100%)                             |
| SMK_OTHER_TOB_CUR_OTSP              | Other types of tobacco or nicotine products currently used, specify                                           | C     | I     | C     | C     | C      | C      | I      | I     | I     | C     | C     | I     | 7 (58.3%)                             |
| SMK_OTHER_TOB_EVER                  | Ever used other type of tobacco or nicotine products                                                          | C     | C     | C     | C     | C      | C      | C      | C     | C     | C     | C     | C     | 12 (100%)                             |
| SMK_OTHER_TOB_EVER_OTSP             | Other types of tobacco or nicotine products ever used, specify                                                | C     | I     | C     | C     | C      | C      | I      | I     | I     | C     | C     | I     | 7 (58.3%)                             |
| SMK_PAAN_CUR                        | Currently uses paan                                                                                           | C     | C     | C     | C     | C      | C      | C      | C     | C     | C     | C     | C     | 12 (100%)                             |
| SMK_PAAN_EVER                       | Ever used paan                                                                                                | C     | C     | C     | C     | C      | C      | C      | C     | C     | C     | C     | C     | 12 (100%)                             |
| SMK_PATCH_CUR                       | Currently uses nicotine patches                                                                               | C     | I     | I     | C     | C      | C      | I      | I     | C     | C     | C     | I     | 7 (58.3%)                             |
| SMK_PATCH_EVER                      | Ever used nicotine patches                                                                                    | C     | I     | I     | C     | C      | C      | I      | I     | C     | C     | C     | I     | 7 (58.3%)                             |
| SMK_PIPE_CUR                        | Currently smokes pipes                                                                                        | C     | C     | C     | C     | C      | C      | C      | C     | C     | C     | C     | C     | 12 (100%)                             |
| SMK_PIPE_EVER                       | Ever smoked pipes                                                                                             | C     | C     | C     | C     | C      | C      | C      | C     | C     | C     | C     | C     | 12 (100%)                             |
| SMK_SHEESHA_CUR                     | Currently smokes sheesha                                                                                      | C     | C     | C     | C     | C      | C      | C      | C     | C     | C     | C     | C     | 12 (100%)                             |
| SMK_SHEESHA_EVER                    | Ever smoked sheesha                                                                                           | C     | C     | C     | C     | C      | C      | C      | C     | C     | C     | C     | C     | 12 (100%)                             |
| SMK_SMALL_CIGAR_CUR                 | Currently smokes small cigars                                                                                 | C     | C     | C     | C     | C      | C      | C      | C     | C     | C     | C     | C     | 12 (100%)                             |
| SMK_SMALL_CIGAR_EVER                | Ever smoked small cigars                                                                                      | C     | C     | C     | C     | C      | C      | C      | C     | C     | C     | C     | C     | 12 (100%)                             |
| SMK_SNUFF_CUR                       | Currently uses chewing tobacco or snuff                                                                       | C     | C     | C     | C     | C      | C      | C      | C     | C     | C     | C     | C     | 12 (100%)                             |
| SMK_SNUFF_EVER                      | Ever used chewing tobacco or snuff                                                                            | C     | C     | C     | C     | C      | C      | C      | C     | C     | C     | C     | C     | 12 (100%)                             |
| <b>Lifestyle behaviours-Alcohol</b> |                                                                                                               |       |       |       |       |        |        |        |       |       |       |       |       |                                       |
| ALC_BEER_WEEK                       | Current quantity of beer consumed per week                                                                    | C     | C     | C     | C     | C      | C      | I      | C     | I     | C     | C     | C     | 10 (83.3%)                            |
| ALC_BEER_WEEK_CAT                   | Current quantity of beer consumed per week - categorical                                                      | C     | C     | C     | C     | C      | C      | I      | C     | C     | C     | C     | C     | 11 (91.7%)                            |
| ALC_BEER_WKDAY                      | Current quantity of beer consumed on weekdays                                                                 | I     | C     | C     | I     | I      | I      | I      | C     | I     | I     | I     | C     | 4 (33.3%)                             |
| ALC_BEER_WKEND                      | Current quantity of beer consumed on weekend days                                                             | I     | C     | C     | I     | I      | I      | I      | C     | I     | I     | I     | C     | 4 (33.3%)                             |
| ALC_BINGE_FREQ_FEMALE               | Frequency of binge drinking - Female                                                                          | C     | C     | C     | C     | C      | C      | C      | C     | C     | C     | C     | C     | 12 (100%)                             |

Appendix 2 (as supplied by the authors): Harmonization potential of the Health and Risk Factor Questionnaire variables (Version 2.0 - Oct. 2017)

| Variable                                                      | label                                                                | ATL-1 | ATL-2 | ATP-1 | ATP-2 | BCGP-1 | BCGP-2 | BCGP-3 | CAG-1 | CAG-2 | OHS-1 | OHS-2 | OHS-3 | Variable with a complete status n (%) |
|---------------------------------------------------------------|----------------------------------------------------------------------|-------|-------|-------|-------|--------|--------|--------|-------|-------|-------|-------|-------|---------------------------------------|
| ALC_BINGE_FREQ_MALE                                           | Frequency of binge drinking - Male                                   | C     | C     | C     | C     | C      | C      | C      | C     | C     | C     | C     | C     | 12 (100%)                             |
| ALC_CUR_FREQ                                                  | Current use of alcohol                                               | C     | C     | C     | C     | C      | C      | C      | C     | C     | C     | C     | C     | 12 (100%)                             |
| ALC_EVER                                                      | Ever alcohol consumption                                             | C     | C     | C     | C     | C      | C      | C      | C     | C     | C     | C     | C     | 12 (100%)                             |
| ALC_HEAVIEST_INTAKE                                           | Current alcohol consumption compared to heaviest intake              | I     | C     | C     | I     | I      | I      | C      | C     | C     | I     | I     | I     | 5 (41.7%)                             |
| ALC_LIQUOR_WEEK                                               | Current quantity of liquor consumed per week                         | C     | C     | C     | C     | C      | C      | I      | C     | I     | C     | C     | C     | 10 (83.3%)                            |
| ALC_LIQUOR_WEEK_CAT                                           | Current quantity of liquor consumed per week - categorical           | C     | C     | C     | C     | C      | C      | I      | C     | C     | C     | C     | C     | 11 (91.7%)                            |
| ALC_LIQUOR_WKDAY                                              | Current quantity of liquor or spirits consumed on weekdays           | I     | C     | C     | I     | I      | I      | I      | C     | I     | I     | I     | C     | 4 (33.3%)                             |
| ALC_LIQUOR_WKEND                                              | Current quantity of liquor or spirits consumed on weekend days       | I     | C     | C     | I     | I      | I      | I      | C     | I     | I     | I     | C     | 4 (33.3%)                             |
| ALC_OTHER_WEEK                                                | Current quantity of other drink consumed                             | C     | C     | C     | C     | C      | C      | I      | C     | I     | C     | C     | I     | 9 (75%)                               |
| ALC_OTHER_WEEK_CAT                                            | Current quantity of other drink consumed - categorical               | C     | C     | C     | C     | C      | C      | I      | C     | C     | C     | C     | I     | 10 (83.3%)                            |
| ALC_OTHER_WKDAY                                               | Current quantity of other kind of alcohol consumed on weekdays       | I     | C     | C     | I     | I      | I      | I      | C     | I     | I     | I     | I     | 3 (25%)                               |
| ALC_OTHER_WKEND                                               | Current quantity of other kind of alcohol consumed on weekend days   | I     | C     | C     | I     | I      | I      | I      | C     | I     | I     | I     | I     | 3 (25%)                               |
| ALC_RED_WINE_WEEK                                             | Current quantity of red wine consumed per week                       | C     | C     | C     | C     | C      | C      | I      | C     | I     | C     | C     | C     | 10 (83.3%)                            |
| ALC_RED_WINE_WEEK_CAT                                         | Current quantity of red wine consumed per week - categorical         | C     | C     | C     | C     | C      | C      | I      | C     | C     | C     | C     | C     | 11 (91.7%)                            |
| ALC_RED_WINE_WKDAY                                            | Current quantity of red wine consumed on weekdays                    | I     | C     | C     | I     | I      | I      | I      | C     | I     | I     | I     | C     | 4 (33.3%)                             |
| ALC_RED_WINE_WKEND                                            | Current quantity of red wine consumed on weekend days                | I     | C     | C     | I     | I      | I      | I      | C     | I     | I     | I     | C     | 4 (33.3%)                             |
| ALC_WHITE_WINE_WEEK                                           | Current quantity of white wine consumed per week                     | C     | C     | C     | C     | C      | C      | I      | C     | I     | C     | C     | C     | 10 (83.3%)                            |
| ALC_WHITE_WINE_WEEK_CAT                                       | Current quantity of white wine consumed per week - categorical       | C     | C     | C     | C     | C      | C      | I      | C     | C     | C     | C     | C     | 11 (91.7%)                            |
| ALC_WHITE_WINE_WKDAY                                          | Current quantity of white wine consumed on weekdays                  | I     | C     | C     | I     | I      | I      | I      | C     | I     | I     | I     | C     | 4 (33.3%)                             |
| ALC_WHITE_WINE_WKEND                                          | Current quantity of white wine consumed on weekend days              | I     | C     | C     | I     | I      | I      | I      | C     | I     | I     | I     | C     | 4 (33.3%)                             |
| ALC_WKEND                                                     | Alcohol mostly drank on weekend days                                 | C     | I     | I     | C     | C      | C      | I      | I     | C     | C     | C     | I     | 7 (58.3%)                             |
| <b>Lifestyle behaviours-Nutrition</b>                         |                                                                      |       |       |       |       |        |        |        |       |       |       |       |       |                                       |
| NUT_FRUITS_QTY                                                | Quantity of fruits consumed                                          | C     | C     | C     | C     | C      | C      | C      | C     | I     | C     | C     | C     | 11 (91.7%)                            |
| NUT_FRUITS_QTY_CAT                                            | Quantity of fruits consumed - categorical                            | C     | C     | C     | C     | C      | C      | C      | C     | C     | C     | C     | C     | 12 (100%)                             |
| NUT_JUICE_QTY                                                 | Quantity of 100 percent fruit-vegetable juice consumed               | C     | C     | C     | C     | C      | C      | C      | C     | I     | C     | C     | C     | 11 (91.7%)                            |
| NUT_JUICE_QTY_CAT                                             | Quantity of 100 percent fruit-vegetable juice consumed - categorical | C     | C     | C     | C     | C      | C      | C      | C     | C     | C     | C     | C     | 12 (100%)                             |
| NUT_VEG_QTY                                                   | Quantity of vegetables consumed                                      | C     | C     | C     | C     | C      | C      | C      | C     | I     | C     | C     | C     | 11 (91.7%)                            |
| NUT_VEG_QTY_CAT                                               | Quantity of vegetables consumed - categorical                        | C     | C     | C     | C     | C      | C      | C      | C     | C     | C     | C     | C     | 12 (100%)                             |
| <b>Lifestyle behaviours-Sleep</b>                             |                                                                      |       |       |       |       |        |        |        |       |       |       |       |       |                                       |
| SLE_LIGHT_EXP                                                 | Exposure to light at night                                           | C     | C     | C     | C     | C      | C      | C      | C     | C     | C     | C     | C     | 12 (100%)                             |
| SLE_TIME                                                      | Number of minutes usually slept                                      | C     | C     | C     | C     | C      | C      | C      | C     | C     | C     | C     | I     | 10 (83.3%)                            |
| SLE_TIME_CAT                                                  | Number of minutes usually slept - categorical                        | C     | C     | C     | C     | C      | C      | C      | C     | C     | C     | C     | I     | 11 (91.7%)                            |
| SLE_TROUBLE_FREQ                                              | Frequency trouble to sleep                                           | C     | C     | C     | C     | C      | C      | C      | C     | C     | C     | C     | I     | 11 (91.7%)                            |
| <b>Health status functional-Perception health limitations</b> |                                                                      |       |       |       |       |        |        |        |       |       |       |       |       |                                       |
| HS_GEN_HEALTH                                                 | Perception of health                                                 | C     | C     | C     | C     | C      | C      | C      | C     | C     | C     | C     | C     | 12 (100%)                             |
| <b>Diseases-Neoplasm</b>                                      |                                                                      |       |       |       |       |        |        |        |       |       |       |       |       |                                       |
| DIS_CANCER1                                                   | Cancer 1: Type                                                       | C     | I     | C     | C     | C      | C      | C      | C     | C     | C     | C     | C     | 11 (91.7%)                            |
| DIS_CANCER1_AGE                                               | Cancer 1: Age at first diagnosis                                     | C     | I     | C     | C     | C      | C      | C      | C     | C     | C     | C     | C     | 11 (91.7%)                            |
| DIS_CANCER1_OTSP                                              | Cancer 1: Type, other specify                                        | C     | I     | C     | C     | C      | C      | C      | C     | C     | C     | C     | C     | 11 (91.7%)                            |
| DIS_CANCER1_TX                                                | Cancer 1: Ever treated                                               | C     | I     | C     | C     | C      | C      | C      | C     | C     | C     | C     | C     | 11 (91.7%)                            |
| DIS_CANCER1_TX_CHEMO                                          | Cancer 1: Ever treated with chemotherapy                             | C     | I     | C     | C     | C      | C      | C      | C     | C     | C     | C     | C     | 11 (91.7%)                            |
| DIS_CANCER1_TX_OTHER                                          | Cancer 1: Ever treated with other treatment                          | C     | I     | C     | C     | C      | C      | C      | C     | C     | C     | C     | C     | 11 (91.7%)                            |
| DIS_CANCER1_TX_OTSP                                           | Cancer 1: Ever treated with other treatment, other specify           | C     | I     | C     | C     | C      | C      | I      | C     | C     | C     | C     | I     | 9 (75%)                               |
| DIS_CANCER1_TX_RAD                                            | Cancer 1: Ever treated with radiation                                | C     | I     | C     | C     | C      | C      | C      | C     | C     | C     | C     | C     | 11 (91.7%)                            |
| DIS_CANCER1_TX_SURG                                           | Cancer 1: Ever treated with surgery                                  | C     | I     | C     | C     | C      | C      | C      | C     | C     | C     | C     | C     | 11 (91.7%)                            |
| DIS_CANCER2                                                   | Cancer 2: Type                                                       | C     | I     | C     | C     | C      | C      | C      | C     | C     | C     | C     | C     | 11 (91.7%)                            |
| DIS_CANCER2_AGE                                               | Cancer 2: Age at first diagnosis                                     | C     | I     | C     | C     | C      | C      | C      | C     | C     | C     | C     | C     | 11 (91.7%)                            |
| DIS_CANCER2_OTSP                                              | Cancer 2: Type, other specify                                        | C     | I     | C     | C     | C      | C      | C      | C     | C     | C     | C     | C     | 11 (91.7%)                            |
| DIS_CANCER2_TX                                                | Cancer 2: Ever treated                                               | C     | I     | C     | C     | C      | C      | C      | C     | C     | C     | C     | C     | 11 (91.7%)                            |
| DIS_CANCER2_TX_CHEMO                                          | Cancer 2: Ever treated with chemotherapy                             | C     | I     | C     | C     | C      | C      | C      | C     | C     | C     | C     | C     | 11 (91.7%)                            |
| DIS_CANCER2_TX_OTHER                                          | Cancer 2: Ever treated with other treatment                          | C     | I     | C     | C     | C      | C      | C      | C     | C     | C     | C     | C     | 11 (91.7%)                            |
| DIS_CANCER2_TX_OTSP                                           | Cancer 2: Ever treated with other treatment, other specify           | C     | I     | C     | C     | C      | C      | I      | C     | C     | C     | C     | I     | 9 (75%)                               |
| DIS_CANCER2_TX_RAD                                            | Cancer 2: Ever treated with radiation                                | C     | I     | C     | C     | C      | C      | C      | C     | C     | C     | C     | C     | 11 (91.7%)                            |
| DIS_CANCER2_TX_SURG                                           | Cancer 2: Ever treated with surgery                                  | C     | I     | C     | C     | C      | C      | C      | C     | C     | C     | C     | C     | 11 (91.7%)                            |
| DIS_CANCER3                                                   | Cancer 3: Type                                                       | C     | I     | C     | C     | C      | C      | C      | C     | C     | C     | C     | C     | 11 (91.7%)                            |
| DIS_CANCER3_AGE                                               | Cancer 3: Age at first diagnosis                                     | C     | I     | C     | C     | C      | C      | C      | C     | C     | C     | C     | C     | 11 (91.7%)                            |
| DIS_CANCER3_OTSP                                              | Cancer 3: Type, other specify                                        | C     | I     | C     | C     | C      | C      | C      | C     | C     | C     | C     | C     | 11 (91.7%)                            |
| DIS_CANCER3_TX                                                | Cancer 3: Ever treated                                               | C     | I     | C     | C     | C      | C      | C      | C     | C     | C     | C     | C     | 11 (91.7%)                            |
| DIS_CANCER3_TX_CHEMO                                          | Cancer 3: Ever treated with chemotherapy                             | C     | I     | C     | C     | C      | C      | C      | C     | C     | C     | C     | C     | 11 (91.7%)                            |
| DIS_CANCER3_TX_OTHER                                          | Cancer 3: Ever treated with other treatment                          | C     | I     | C     | C     | C      | C      | C      | C     | C     | C     | C     | C     | 11 (91.7%)                            |
| DIS_CANCER3_TX_OTSP                                           | Cancer 3: Ever treated with other treatment, other specify           | C     | I     | C     | C     | C      | C      | I      | C     | C     | C     | C     | I     | 9 (75%)                               |
| DIS_CANCER3_TX_RAD                                            | Cancer 3: Ever treated with radiation                                | C     | I     | C     | C     | C      | C      | C      | C     | C     | C     | C     | C     | 11 (91.7%)                            |
| DIS_CANCER3_TX_SURG                                           | Cancer 3: Ever treated with surgery                                  | C     | I     | C     | C     | C      | C      | C      | C     | C     | C     | C     | C     | 11 (91.7%)                            |
| DIS_CANCER4                                                   | Cancer 4: Type                                                       | I     | I     | I     | I     | I      | I      | C      | I     | I     | I     | C     | C     | 3 (25%)                               |

Appendix 2 (as supplied by the authors): Harmonization potential of the Health and Risk Factor Questionnaire variables (Version 2.0 - Oct. 2017)

| Variable                       | label                                          | ATL-1 | ATL-2 | ATP-1 | ATP-2 | BCGP-1 | BCGP-2 | BCGP-3 | CAG-1 | CAG-2 | OHS-1 | OHS-2 | OHS-3 | Variable with a complete status n (%) |
|--------------------------------|------------------------------------------------|-------|-------|-------|-------|--------|--------|--------|-------|-------|-------|-------|-------|---------------------------------------|
| DIS_CANCER4_AGE                | Cancer 4: Age at first diagnosis               | I     | I     | I     | I     | I      | I      | C      | I     | I     | I     | C     | C     | 3 (25%)                               |
| DIS_CANCER4_OTSP               | Cancer 4: Type, other specify                  | I     | I     | I     | I     | I      | I      | C      | I     | I     | I     | C     | C     | 3 (25%)                               |
| DIS_CANCER4_TX                 | Cancer 4: Ever treated                         | I     | I     | I     | I     | I      | I      | C      | I     | I     | I     | C     | C     | 3 (25%)                               |
| DIS_CANCER4_TX_CHEMO           | Cancer 4: Ever treated with chemotherapy       | I     | I     | I     | I     | I      | I      | C      | I     | I     | I     | C     | C     | 3 (25%)                               |
| DIS_CANCER4_TX_OTHER           | Cancer 4: Ever treated with other treatment    | I     | I     | I     | I     | I      | I      | C      | I     | I     | I     | C     | C     | 3 (25%)                               |
| DIS_CANCER4_TX_RAD             | Cancer 4: Ever treated with radiation          | I     | I     | I     | I     | I      | I      | C      | I     | I     | I     | C     | C     | 3 (25%)                               |
| DIS_CANCER4_TX_SURG            | Cancer 4: Ever treated with surgery            | I     | I     | I     | I     | I      | I      | C      | I     | I     | I     | C     | C     | 3 (25%)                               |
| DIS_CANCER_CHILD_BLADDER       | Children bladder cancer                        | C     | I     | C     | C     | C      | C      | C      | C     | C     | C     | C     | C     | 11 (91.7%)                            |
| DIS_CANCER_CHILD_BLADDER_NUM   | Number of children with bladder cancer         | C     | I     | C     | C     | C      | C      | C      | C     | C     | C     | C     | C     | 11 (91.7%)                            |
| DIS_CANCER_CHILD_BRAIN         | Children brain cancer                          | C     | I     | C     | C     | C      | C      | C      | C     | C     | C     | C     | C     | 11 (91.7%)                            |
| DIS_CANCER_CHILD_BRAIN_NUM     | Number of children with brain cancer           | C     | I     | C     | C     | C      | C      | C      | C     | C     | C     | C     | C     | 11 (91.7%)                            |
| DIS_CANCER_CHILD_BREAST        | Children breast cancer                         | C     | I     | C     | C     | C      | C      | C      | C     | C     | C     | C     | C     | 11 (91.7%)                            |
| DIS_CANCER_CHILD_BREAST_NUM    | Number of children with breast cancer          | C     | I     | C     | C     | C      | C      | C      | C     | C     | C     | C     | C     | 11 (91.7%)                            |
| DIS_CANCER_CHILD_CERVIX        | Children cervical cancer                       | C     | I     | C     | C     | C      | C      | C      | C     | C     | C     | C     | C     | 11 (91.7%)                            |
| DIS_CANCER_CHILD_CERVIX_NUM    | Number of children with cervical cancer        | C     | I     | C     | C     | C      | C      | C      | C     | C     | C     | C     | C     | 11 (91.7%)                            |
| DIS_CANCER_CHILD_COLON         | Children colon cancer                          | C     | I     | C     | C     | C      | C      | C      | C     | C     | C     | C     | C     | 11 (91.7%)                            |
| DIS_CANCER_CHILD_COLON_NUM     | Number of children with colon cancer           | C     | I     | C     | C     | C      | C      | C      | C     | C     | C     | C     | C     | 11 (91.7%)                            |
| DIS_CANCER_CHILD_ESOPHAGUS     | Children esophageal cancer                     | C     | I     | C     | C     | C      | C      | C      | C     | C     | C     | C     | C     | 11 (91.7%)                            |
| DIS_CANCER_CHILD_ESOPHAGUS_NUM | Number of children with esophageal cancer      | C     | I     | C     | C     | C      | C      | C      | C     | C     | C     | C     | C     | 11 (91.7%)                            |
| DIS_CANCER_CHILD_EVER          | Lifetime occurrence of cancer in children      | C     | I     | I     | C     | C      | C      | C      | I     | I     | C     | I     | C     | 7 (58.3%)                             |
| DIS_CANCER_CHILD_KIDNEY        | Children kidney cancer                         | C     | I     | C     | C     | C      | C      | C      | C     | C     | C     | C     | C     | 11 (91.7%)                            |
| DIS_CANCER_CHILD_KIDNEY_NUM    | Number of children with kidney cancer          | C     | I     | C     | C     | C      | C      | C      | C     | C     | C     | C     | C     | 11 (91.7%)                            |
| DIS_CANCER_CHILD_LARYNX        | Children laryngeal cancer                      | C     | I     | C     | C     | C      | C      | C      | C     | C     | C     | C     | C     | 11 (91.7%)                            |
| DIS_CANCER_CHILD_LARYNX_NUM    | Number of children with laryngeal cancer       | C     | I     | C     | C     | C      | C      | C      | C     | C     | C     | C     | C     | 11 (91.7%)                            |
| DIS_CANCER_CHILD_LEUKEMIA      | Children leukemia                              | C     | I     | C     | C     | C      | C      | C      | C     | C     | C     | C     | C     | 11 (91.7%)                            |
| DIS_CANCER_CHILD_LEUKEMIA_NUM  | Number of children with leukemia               | C     | I     | C     | C     | C      | C      | C      | C     | C     | C     | C     | C     | 11 (91.7%)                            |
| DIS_CANCER_CHILD_LIVER         | Children liver cancer                          | C     | I     | C     | C     | C      | C      | C      | C     | C     | C     | C     | C     | 11 (91.7%)                            |
| DIS_CANCER_CHILD_LIVER_NUM     | Number of children with liver cancer           | C     | I     | C     | C     | C      | C      | C      | C     | C     | C     | C     | C     | 11 (91.7%)                            |
| DIS_CANCER_CHILD_LUNG          | Children lung cancer                           | C     | I     | C     | C     | C      | C      | C      | C     | C     | C     | C     | C     | 11 (91.7%)                            |
| DIS_CANCER_CHILD_LUNG_NUM      | Number of children with lung cancer            | C     | I     | C     | C     | C      | C      | C      | C     | C     | C     | C     | C     | 11 (91.7%)                            |
| DIS_CANCER_CHILD_LYMPHOMA      | Children lymphoma                              | C     | I     | C     | C     | C      | C      | C      | I     | C     | C     | C     | C     | 10 (83.3%)                            |
| DIS_CANCER_CHILD_LYMPHOMA_NUM  | Number of children with lymphoma               | C     | I     | C     | C     | C      | C      | C      | I     | C     | C     | C     | C     | 10 (83.3%)                            |
| DIS_CANCER_CHILD_NHL           | Children non-Hodgkin's lymphoma                | C     | I     | C     | C     | C      | C      | C      | C     | C     | C     | C     | C     | 11 (91.7%)                            |
| DIS_CANCER_CHILD_NHL_NUM       | Number of children with non-Hodgkin's lymphoma | C     | I     | C     | C     | C      | C      | C      | C     | C     | C     | C     | C     | 11 (91.7%)                            |
| DIS_CANCER_CHILD_OTHER         | Children other cancer                          | C     | I     | C     | C     | C      | C      | C      | C     | C     | C     | C     | C     | 11 (91.7%)                            |
| DIS_CANCER_CHILD_OTHER_NUM     | Number of children with other cancer           | C     | I     | C     | C     | C      | C      | C      | C     | C     | C     | C     | C     | 11 (91.7%)                            |
| DIS_CANCER_CHILD_OTSP          | Children cancer, other specify                 | C     | I     | C     | C     | C      | C      | C      | C     | C     | C     | C     | C     | 11 (91.7%)                            |
| DIS_CANCER_CHILD_OVARY         | Children ovarian cancer                        | C     | I     | C     | C     | C      | C      | C      | C     | C     | C     | C     | C     | 11 (91.7%)                            |
| DIS_CANCER_CHILD_OVARY_NUM     | Number of children with ovarian cancer         | C     | I     | C     | C     | C      | C      | C      | C     | C     | C     | C     | C     | 11 (91.7%)                            |
| DIS_CANCER_CHILD_PANCREAS      | Children pancreatic cancer                     | C     | I     | C     | C     | C      | C      | C      | C     | C     | C     | C     | C     | 11 (91.7%)                            |
| DIS_CANCER_CHILD_PANCREAS_NUM  | Number of children with pancreatic cancer      | C     | I     | C     | C     | C      | C      | C      | C     | C     | C     | C     | C     | 11 (91.7%)                            |
| DIS_CANCER_CHILD_PROSTATE      | Children prostate cancer                       | C     | I     | C     | C     | C      | C      | C      | C     | C     | C     | C     | C     | 11 (91.7%)                            |
| DIS_CANCER_CHILD_PROSTATE_NUM  | Number of children with prostate cancer        | C     | I     | C     | C     | C      | C      | C      | C     | C     | C     | C     | C     | 11 (91.7%)                            |
| DIS_CANCER_CHILD_RECTUM        | Children rectal cancer                         | C     | I     | C     | C     | C      | C      | C      | C     | C     | C     | C     | C     | 11 (91.7%)                            |
| DIS_CANCER_CHILD_RECTUM_NUM    | Number of children with rectal cancer          | C     | I     | C     | C     | C      | C      | C      | C     | C     | C     | C     | C     | 11 (91.7%)                            |
| DIS_CANCER_CHILD_SKIN          | Children skin cancer                           | C     | I     | C     | C     | C      | C      | C      | C     | C     | C     | C     | C     | 11 (91.7%)                            |
| DIS_CANCER_CHILD_SKIN_NUM      | Number of children with skin cancer            | C     | I     | C     | C     | C      | C      | C      | C     | C     | C     | C     | C     | 11 (91.7%)                            |
| DIS_CANCER_CHILD_STOMACH       | Children stomach cancer                        | C     | I     | C     | C     | C      | C      | C      | C     | C     | C     | C     | C     | 11 (91.7%)                            |
| DIS_CANCER_CHILD_STOMACH_NUM   | Number of children with stomach cancer         | C     | I     | C     | C     | C      | C      | C      | C     | C     | C     | C     | C     | 11 (91.7%)                            |
| DIS_CANCER_CHILD_THYROID       | Children thyroid cancer                        | C     | I     | C     | C     | C      | C      | C      | C     | C     | C     | C     | C     | 11 (91.7%)                            |
| DIS_CANCER_CHILD_THYROID_NUM   | Number of children with thyroid cancer         | C     | I     | C     | C     | C      | C      | C      | C     | C     | C     | C     | C     | 11 (91.7%)                            |
| DIS_CANCER_CHILD_TRACHEA       | Children tracheal cancer                       | C     | I     | C     | C     | C      | C      | C      | C     | C     | C     | C     | C     | 11 (91.7%)                            |
| DIS_CANCER_CHILD_TRACHEA_NUM   | Number of children with tracheal cancer        | C     | I     | C     | C     | C      | C      | C      | C     | C     | C     | C     | C     | 11 (91.7%)                            |
| DIS_CANCER_CHILD_UTERUS        | Children uterine cancer                        | C     | I     | C     | C     | C      | C      | C      | C     | C     | C     | C     | C     | 11 (91.7%)                            |
| DIS_CANCER_CHILD_UTERUS_NUM    | Number of children with uterine cancer         | C     | I     | C     | C     | C      | C      | C      | C     | C     | C     | C     | C     | 11 (91.7%)                            |
| DIS_CANCER_EVER                | Lifetime occurrence of cancer                  | C     | C     | C     | C     | C      | C      | C      | C     | C     | C     | C     | C     | 12 (100%)                             |
| DIS_CANCER_FAM_EVER            | Lifetime occurrence of cancer in family        | C     | I     | C     | C     | C      | C      | C      | C     | C     | C     | C     | C     | 11 (91.7%)                            |
| DIS_CANCER_F_BLADDER           | Father bladder cancer                          | C     | I     | C     | C     | C      | C      | C      | C     | C     | C     | C     | C     | 11 (91.7%)                            |
| DIS_CANCER_F_BRAIN             | Father brain cancer                            | C     | I     | C     | C     | C      | C      | C      | C     | C     | C     | C     | C     | 11 (91.7%)                            |
| DIS_CANCER_F_BREAST            | Father breast cancer                           | C     | I     | C     | C     | C      | C      | C      | C     | C     | C     | C     | C     | 11 (91.7%)                            |
| DIS_CANCER_F_COLON             | Father colon cancer                            | C     | I     | C     | C     | C      | C      | C      | C     | C     | C     | C     | C     | 11 (91.7%)                            |
| DIS_CANCER_F_ESOPHAGUS         | Father esophageal cancer                       | C     | I     | C     | C     | C      | C      | C      | C     | C     | C     | C     | C     | 11 (91.7%)                            |
| DIS_CANCER_F_EVER              | Lifetime occurrence of cancer in father        | C     | I     | I     | C     | C      | C      | C      | I     | C     | I     | C     | C     | 8 (66.7%)                             |
| DIS_CANCER_F_KIDNEY            | Father kidney cancer                           | C     | I     | C     | C     | C      | C      | C      | C     | C     | C     | C     | C     | 11 (91.7%)                            |
| DIS_CANCER_F_LARYNX            | Father laryngeal cancer                        | C     | I     | C     | C     | C      | C      | C      | C     | C     | C     | C     | C     | 11 (91.7%)                            |
| DIS_CANCER_F_LEUKEMIA          | Father leukemia                                | C     | I     | C     | C     | C      | C      | C      | C     | C     | C     | C     | C     | 11 (91.7%)                            |
| DIS_CANCER_F_LIVER             | Father liver cancer                            | C     | I     | C     | C     | C      | C      | C      | C     | C     | C     | C     | C     | 11 (91.7%)                            |
| DIS_CANCER_F_LUNG              | Father lung cancer                             | C     | I     | C     | C     | C      | C      | C      | C     | C     | C     | C     | C     | 11 (91.7%)                            |
| DIS_CANCER_F_LYMPHOMA          | Father lymphoma                                | C     | I     | C     | C     | C      | C      | C      | I     | C     | C     | C     | C     | 10 (83.3%)                            |
| DIS_CANCER_F_NHL               | Father non-Hodgkin's lymphoma                  | C     | I     | C     | C     | C      | C      | C      | C     | C     | C     | C     | C     | 11 (91.7%)                            |
| DIS_CANCER_F_OTHER             | Father other cancer                            | C     | I     | C     | C     | C      | C      | C      | C     | C     | C     | C     | C     | 11 (91.7%)                            |
| DIS_CANCER_F_OTSP              | Father cancer, other specify                   | C     | I     | C     | C     | C      | C      | C      | C     | C     | C     | C     | C     | 11 (91.7%)                            |
| DIS_CANCER_F_PANCREAS          | Father pancreatic cancer                       | C     | I     | C     | C     | C      | C      | C      | C     | C     | C     | C     | C     | 11 (91.7%)                            |
| DIS_CANCER_F_PROSTATE          | Father prostate cancer                         | C     | I     | C     | C     | C      | C      | C      | C     | C     | C     | C     | C     | 11 (91.7%)                            |
| DIS_CANCER_F_RECTUM            | Father rectal cancer                           | C     | I     | C     | C     | C      | C      | C      | C     | C     | C     | C     | C     | 11 (91.7%)                            |
| DIS_CANCER_F_SKIN              | Father skin cancer                             | C     | I     | C     | C     | C      | C      | C      | C     | C     | C     | C     | C     | 11 (91.7%)                            |
| DIS_CANCER_F_STOMACH           | Father stomach cancer                          | C     | I     | C     | C     | C      | C      | C      | C     | C     | C     | C     | C     | 11 (91.7%)                            |
| DIS_CANCER_F_THYROID           | Father thyroid cancer                          | C     | I     | C     | C     | C      | C      | C      | C     | C     | C     | C     | C     | 11 (91.7%)                            |
| DIS_CANCER_F_TRACHEA           | Father tracheal cancer                         | C     | I     | C     | C     | C      | C      | C      | C     | C     | C     | C     | C     | 11 (91.7%)                            |
| DIS_CANCER_M_BLADDER           | Mother bladder cancer                          | C     | I     | C     | C     | C      | C      | C      | C     | C     | C     | C     | C     | 11 (91.7%)                            |

Appendix 2 (as supplied by the authors): Harmonization potential of the Health and Risk Factor Questionnaire variables (Version 2.0 - Oct. 2017)

| Variable                         | label                                                | ATL-1 | ATL-2 | ATP-1 | ATP-2 | BCGP-1 | BCGP-2 | BCGP-3 | CAG-1 | CAG-2 | OHS-1 | OHS-2 | OHS-3 | Variable with a complete status n (%) |
|----------------------------------|------------------------------------------------------|-------|-------|-------|-------|--------|--------|--------|-------|-------|-------|-------|-------|---------------------------------------|
| DIS_CANCER_M_BRAIN               | Mother brain cancer                                  | C     | I     | C     | C     | C      | C      | C      | C     | C     | C     | C     | C     | 11 (91.7%)                            |
| DIS_CANCER_M_BREAST              | Mother breast cancer                                 | C     | I     | C     | C     | C      | C      | C      | C     | C     | C     | C     | C     | 11 (91.7%)                            |
| DIS_CANCER_M_CERVIX              | Mother cervical cancer                               | C     | I     | C     | C     | C      | C      | C      | C     | C     | C     | C     | C     | 11 (91.7%)                            |
| DIS_CANCER_M_COLON               | Mother colon cancer                                  | C     | I     | C     | C     | C      | C      | C      | C     | C     | C     | C     | C     | 11 (91.7%)                            |
| DIS_CANCER_M_ESOPHAGUS           | Mother esophageal cancer                             | C     | I     | C     | C     | C      | C      | C      | C     | C     | C     | C     | C     | 11 (91.7%)                            |
| DIS_CANCER_M_EVER                | Lifetime occurrence of cancer in mother              | C     | I     | I     | C     | C      | C      | C      | C     | I     | C     | I     | C     | 8 (66.7%)                             |
| DIS_CANCER_M_KIDNEY              | Mother kidney cancer                                 | C     | I     | C     | C     | C      | C      | C      | C     | C     | C     | C     | C     | 11 (91.7%)                            |
| DIS_CANCER_M_LARYNX              | Mother laryngeal cancer                              | C     | I     | C     | C     | C      | C      | C      | C     | C     | C     | C     | C     | 11 (91.7%)                            |
| DIS_CANCER_M_LEUKEMIA            | Mother leukemia                                      | C     | I     | C     | C     | C      | C      | C      | C     | C     | C     | C     | C     | 11 (91.7%)                            |
| DIS_CANCER_M_LIVER               | Mother liver cancer                                  | C     | I     | C     | C     | C      | C      | C      | C     | C     | C     | C     | C     | 11 (91.7%)                            |
| DIS_CANCER_M_LUNG                | Mother lung cancer                                   | C     | I     | C     | C     | C      | C      | C      | C     | C     | C     | C     | C     | 11 (91.7%)                            |
| DIS_CANCER_M_LYMPHOMA            | Mother lymphoma                                      | C     | I     | C     | C     | C      | C      | C      | I     | C     | C     | C     | C     | 10 (83.3%)                            |
| DIS_CANCER_M_NHL                 | Mother non-Hodgkin's lymphoma                        | C     | I     | C     | C     | C      | C      | C      | C     | C     | C     | C     | C     | 11 (91.7%)                            |
| DIS_CANCER_M_OTHER               | Mother other cancer                                  | C     | I     | C     | C     | C      | C      | C      | C     | C     | C     | C     | C     | 11 (91.7%)                            |
| DIS_CANCER_M_OTSP                | Mother cancer, other specify                         | C     | I     | C     | C     | C      | C      | C      | C     | C     | C     | C     | C     | 11 (91.7%)                            |
| DIS_CANCER_M_OVARY               | Mother ovarian cancer                                | C     | I     | C     | C     | C      | C      | C      | C     | C     | C     | C     | C     | 11 (91.7%)                            |
| DIS_CANCER_M_PANCREAS            | Mother pancreatic cancer                             | C     | I     | C     | C     | C      | C      | C      | C     | C     | C     | C     | C     | 11 (91.7%)                            |
| DIS_CANCER_M_RECTUM              | Mother rectal cancer                                 | C     | I     | C     | C     | C      | C      | C      | C     | C     | C     | C     | C     | 11 (91.7%)                            |
| DIS_CANCER_M_SKIN                | Mother skin cancer                                   | C     | I     | C     | C     | C      | C      | C      | C     | C     | C     | C     | C     | 11 (91.7%)                            |
| DIS_CANCER_M_STOMACH             | Mother stomach cancer                                | C     | I     | C     | C     | C      | C      | C      | C     | C     | C     | C     | C     | 11 (91.7%)                            |
| DIS_CANCER_M_THYROID             | Mother thyroid cancer                                | C     | I     | C     | C     | C      | C      | C      | C     | C     | C     | C     | C     | 11 (91.7%)                            |
| DIS_CANCER_M_TRACHEA             | Mother tracheal cancer                               | C     | I     | C     | C     | C      | C      | C      | C     | C     | C     | C     | C     | 11 (91.7%)                            |
| DIS_CANCER_M_UTERUS              | Mother uterine cancer                                | C     | I     | C     | C     | C      | C      | C      | C     | C     | C     | C     | C     | 11 (91.7%)                            |
| DIS_CANCER_SIB_BLADDER           | Siblings bladder cancer                              | C     | I     | C     | C     | C      | C      | C      | C     | C     | C     | C     | C     | 11 (91.7%)                            |
| DIS_CANCER_SIB_BLADDER_NUM       | Number of siblings with bladder cancer               | C     | I     | C     | C     | C      | C      | C      | C     | C     | C     | C     | C     | 11 (91.7%)                            |
| DIS_CANCER_SIB_BRAIN             | Siblings brain cancer                                | C     | I     | C     | C     | C      | C      | C      | C     | C     | C     | C     | C     | 11 (91.7%)                            |
| DIS_CANCER_SIB_BRAIN_NUM         | Number of siblings with brain cancer                 | C     | I     | C     | C     | C      | C      | C      | C     | C     | C     | C     | C     | 11 (91.7%)                            |
| DIS_CANCER_SIB_BREAST            | Siblings breast cancer                               | C     | I     | C     | C     | C      | C      | C      | C     | C     | C     | C     | C     | 11 (91.7%)                            |
| DIS_CANCER_SIB_BREAST_NUM        | Number of siblings with breast cancer                | C     | I     | C     | C     | C      | C      | C      | C     | C     | C     | C     | C     | 11 (91.7%)                            |
| DIS_CANCER_SIB_CERVIX            | Siblings cervical cancer                             | C     | I     | C     | C     | C      | C      | C      | C     | C     | C     | C     | C     | 11 (91.7%)                            |
| DIS_CANCER_SIB_CERVIX_NUM        | Number of siblings with cervical cancer              | C     | I     | C     | C     | C      | C      | C      | C     | C     | C     | C     | C     | 11 (91.7%)                            |
| DIS_CANCER_SIB_COLON             | Siblings colon cancer                                | C     | I     | C     | C     | C      | C      | C      | C     | C     | C     | C     | C     | 11 (91.7%)                            |
| DIS_CANCER_SIB_COLON_NUM         | Number of siblings with colon cancer                 | C     | I     | C     | C     | C      | C      | C      | C     | C     | C     | C     | C     | 11 (91.7%)                            |
| DIS_CANCER_SIB_ESOPHAGUS         | Siblings esophageal cancer                           | C     | I     | C     | C     | C      | C      | C      | C     | C     | C     | C     | C     | 11 (91.7%)                            |
| DIS_CANCER_SIB_ESOPHAGUS_NUM     | Number of siblings with esophageal cancer            | C     | I     | C     | C     | C      | C      | C      | C     | C     | C     | C     | C     | 11 (91.7%)                            |
| DIS_CANCER_SIB_EVER              | Lifetime occurrence of cancer in siblings            | C     | I     | I     | C     | C      | C      | C      | I     | I     | C     | I     | C     | 7 (58.3%)                             |
| DIS_CANCER_SIB_KIDNEY            | Siblings kidney cancer                               | C     | I     | C     | C     | C      | C      | C      | C     | C     | C     | C     | C     | 11 (91.7%)                            |
| DIS_CANCER_SIB_KIDNEY_NUM        | Number of siblings with kidney cancer                | C     | I     | C     | C     | C      | C      | C      | C     | C     | C     | C     | C     | 11 (91.7%)                            |
| DIS_CANCER_SIB_LARYNX            | Siblings laryngeal cancer                            | C     | I     | C     | C     | C      | C      | C      | C     | C     | C     | C     | C     | 11 (91.7%)                            |
| DIS_CANCER_SIB_LARYNX_NUM        | Number of siblings with laryngeal cancer             | C     | I     | C     | C     | C      | C      | C      | C     | C     | C     | C     | C     | 11 (91.7%)                            |
| DIS_CANCER_SIB_LEUKEMIA          | Siblings leukemia                                    | C     | I     | C     | C     | C      | C      | C      | C     | C     | C     | C     | C     | 11 (91.7%)                            |
| DIS_CANCER_SIB_LEUKEMIA_NUM      | Number of siblings with leukemia                     | C     | I     | C     | C     | C      | C      | C      | C     | C     | C     | C     | C     | 11 (91.7%)                            |
| DIS_CANCER_SIB_LIVER             | Siblings liver cancer                                | C     | I     | C     | C     | C      | C      | C      | C     | C     | C     | C     | C     | 11 (91.7%)                            |
| DIS_CANCER_SIB_LIVER_NUM         | Number of siblings with liver cancer                 | C     | I     | C     | C     | C      | C      | C      | C     | C     | C     | C     | C     | 11 (91.7%)                            |
| DIS_CANCER_SIB_LUNG              | Siblings lung cancer                                 | C     | I     | C     | C     | C      | C      | C      | C     | C     | C     | C     | C     | 11 (91.7%)                            |
| DIS_CANCER_SIB_LUNG_NUM          | Number of siblings with lung cancer                  | C     | I     | C     | C     | C      | C      | C      | C     | C     | C     | C     | C     | 11 (91.7%)                            |
| DIS_CANCER_SIB_LYMPHOMA          | Siblings lymphoma                                    | C     | I     | C     | C     | C      | C      | C      | C     | C     | C     | C     | C     | 11 (91.7%)                            |
| DIS_CANCER_SIB_LYMPHOMA_NUM      | Number of siblings with lymphoma                     | C     | I     | C     | C     | C      | C      | C      | C     | C     | C     | C     | C     | 11 (91.7%)                            |
| DIS_CANCER_SIB_NHL               | Siblings non-Hodgkin's lymphoma                      | C     | I     | C     | C     | C      | C      | C      | C     | C     | C     | C     | C     | 11 (91.7%)                            |
| DIS_CANCER_SIB_NHL_NUM           | Number of siblings with non-Hodgkin's lymphoma       | C     | I     | C     | C     | C      | C      | C      | C     | C     | C     | C     | C     | 11 (91.7%)                            |
| DIS_CANCER_SIB_OTHER             | Siblings other cancer                                | C     | I     | C     | C     | C      | C      | C      | C     | C     | C     | C     | C     | 11 (91.7%)                            |
| DIS_CANCER_SIB_OTHER_NUM         | Number of siblings with other cancer                 | C     | I     | C     | C     | C      | C      | C      | C     | C     | C     | C     | C     | 11 (91.7%)                            |
| DIS_CANCER_SIB_OTSP              | Siblings cancer, other specify                       | C     | I     | C     | C     | C      | C      | C      | C     | C     | C     | C     | C     | 11 (91.7%)                            |
| DIS_CANCER_SIB_OVARY             | Siblings ovarian cancer                              | C     | I     | C     | C     | C      | C      | C      | C     | C     | C     | C     | C     | 11 (91.7%)                            |
| DIS_CANCER_SIB_OVARY_NUM         | Number of siblings with ovarian cancer               | C     | I     | C     | C     | C      | C      | C      | C     | C     | C     | C     | C     | 11 (91.7%)                            |
| DIS_CANCER_SIB_PANCREAS          | Siblings pancreatic cancer                           | C     | I     | C     | C     | C      | C      | C      | C     | C     | C     | C     | C     | 11 (91.7%)                            |
| DIS_CANCER_SIB_PANCREAS_NUM      | Number of siblings with pancreatic cancer            | C     | I     | C     | C     | C      | C      | C      | C     | C     | C     | C     | C     | 11 (91.7%)                            |
| DIS_CANCER_SIB_PROSTATE          | Siblings prostate cancer                             | C     | I     | C     | C     | C      | C      | C      | C     | C     | C     | C     | C     | 11 (91.7%)                            |
| DIS_CANCER_SIB_PROSTATE_NUM      | Number of siblings with prostate cancer              | C     | I     | C     | C     | C      | C      | C      | C     | C     | C     | C     | C     | 11 (91.7%)                            |
| DIS_CANCER_SIB_RECTUM            | Siblings rectal cancer                               | C     | I     | C     | C     | C      | C      | C      | C     | C     | C     | C     | C     | 11 (91.7%)                            |
| DIS_CANCER_SIB_RECTUM_NUM        | Number of siblings with rectal cancer                | C     | I     | C     | C     | C      | C      | C      | C     | C     | C     | C     | C     | 11 (91.7%)                            |
| DIS_CANCER_SIB_SKIN              | Siblings skin cancer                                 | C     | I     | C     | C     | C      | C      | C      | C     | C     | C     | C     | C     | 11 (91.7%)                            |
| DIS_CANCER_SIB_SKIN_NUM          | Number of siblings with skin cancer                  | C     | I     | C     | C     | C      | C      | C      | C     | C     | C     | C     | C     | 11 (91.7%)                            |
| DIS_CANCER_SIB_STOMACH           | Siblings stomach cancer                              | C     | I     | C     | C     | C      | C      | C      | C     | C     | C     | C     | C     | 11 (91.7%)                            |
| DIS_CANCER_SIB_STOMACH_NUM       | Number of siblings with stomach cancer               | C     | I     | C     | C     | C      | C      | C      | C     | C     | C     | C     | C     | 11 (91.7%)                            |
| DIS_CANCER_SIB_THYROID           | Siblings thyroid cancer                              | C     | I     | C     | C     | C      | C      | C      | C     | C     | C     | C     | C     | 11 (91.7%)                            |
| DIS_CANCER_SIB_THYROID_NUM       | Number of siblings with thyroid cancer               | C     | I     | C     | C     | C      | C      | C      | C     | C     | C     | C     | C     | 11 (91.7%)                            |
| DIS_CANCER_SIB_TRACHEA           | Siblings tracheal cancer                             | C     | I     | C     | C     | C      | C      | C      | C     | C     | C     | C     | C     | 11 (91.7%)                            |
| DIS_CANCER_SIB_TRACHEA_NUM       | Number of siblings with tracheal cancer              | C     | I     | C     | C     | C      | C      | C      | C     | C     | C     | C     | C     | 11 (91.7%)                            |
| DIS_CANCER_SIB_UTERUS            | Siblings uterine cancer                              | C     | I     | C     | C     | C      | C      | C      | C     | C     | C     | C     | C     | 11 (91.7%)                            |
| DIS_CANCER_SIB_UTERUS_NUM        | Number of siblings with uterine cancer               | C     | I     | C     | C     | C      | C      | C      | C     | C     | C     | C     | C     | 11 (91.7%)                            |
| <b>Diseases-Digestive system</b> |                                                      |       |       |       |       |        |        |        |       |       |       |       |       |                                       |
| DIS_CH_AGE                       | Age at first diagnosis of chronic hepatitis          | C     | C     | I     | C     | C      | C      | C      | I     | C     | C     | C     | C     | 10 (83.3%)                            |
| DIS_CH_CHILD_EVER                | Lifetime occurrence of chronic hepatitis in children | C     | I     | I     | C     | C      | C      | I      | I     | C     | C     | C     | I     | 7 (58.3%)                             |
| DIS_CH_CHILD_NUM                 | Number of children with chronic hepatitis            | C     | I     | I     | C     | C      | C      | I      | I     | C     | C     | C     | I     | 7 (58.3%)                             |
| DIS_CH_EVER                      | Lifetime occurrence of chronic hepatitis             | C     | C     | C     | C     | C      | C      | C      | C     | C     | C     | C     | C     | 12 (100%)                             |
| DIS_CH_FAM_EVER                  | Family history of chronic hepatitis                  | C     | I     | I     | C     | C      | C      | I      | I     | C     | C     | C     | I     | 7 (58.3%)                             |
| DIS_CH_F_EVER                    | Lifetime occurrence of father chronic hepatitis      | C     | I     | I     | C     | C      | C      | I      | I     | C     | C     | C     | I     | 7 (58.3%)                             |
| DIS_CH_M_EVER                    | Lifetime occurrence of mother chronic hepatitis      | C     | I     | I     | C     | C      | C      | I      | I     | C     | C     | C     | I     | 7 (58.3%)                             |
| DIS_CH_SIB_EVER                  | Lifetime occurrence of chronic hepatitis in siblings | C     | I     | I     | C     | C      | C      | I      | I     | C     | C     | C     | I     | 7 (58.3%)                             |
| DIS_CH_SIB_NUM                   | Number of siblings with chronic hepatitis            | C     | I     | I     | C     | C      | C      | I      | I     | C     | C     | C     | I     | 7 (58.3%)                             |

Appendix 2 (as supplied by the authors): Harmonization potential of the Health and Risk Factor Questionnaire variables (Version 2.0 - Oct. 2017)

| Variable                           | label                                                                     | ATL-1 | ATL-2 | ATP-1 | ATP-2 | BCGP-1 | BCGP-2 | BCGP-3 | CAG-1 | CAG-2 | OHS-1 | OHS-2 | OHS-3 | Variable with a complete status n (%) |
|------------------------------------|---------------------------------------------------------------------------|-------|-------|-------|-------|--------|--------|--------|-------|-------|-------|-------|-------|---------------------------------------|
| HS_POLYP_EVER                      | Ever had polyp removed from colon                                         | C     | I     | I     | C     | C      | C      | C      | C     | C     | C     | C     | C     | 10 (83.3%)                            |
| DIS_CROHN_AGE                      | Age at first diagnosis of Crohn's disease                                 | C     | C     | I     | C     | C      | C      | C      | I     | C     | C     | C     | C     | 10 (83.3%)                            |
| DIS_CROHN_CHILD_EVER               | Lifetime occurrence of Crohn's disease in children                        | C     | I     | I     | C     | C      | C      | I      | I     | C     | C     | C     | I     | 7 (58.3%)                             |
| DIS_CROHN_CHILD_NUM                | Number of children with Crohn's disease                                   | C     | I     | I     | C     | C      | C      | I      | I     | C     | C     | C     | I     | 7 (58.3%)                             |
| DIS_CROHN_EVER                     | Lifetime occurrence of Crohn's disease                                    | C     | C     | C     | C     | C      | C      | C      | C     | C     | C     | C     | C     | 12 (100%)                             |
| DIS_CROHN_FAM_EVER                 | Family history of Crohn's disease                                         | C     | I     | I     | C     | C      | C      | I      | I     | C     | C     | C     | I     | 7 (58.3%)                             |
| DIS_CROHN_F_EVER                   | Lifetime occurrence of Crohn's disease in father                          | C     | I     | I     | C     | C      | C      | I      | I     | C     | C     | C     | I     | 7 (58.3%)                             |
| DIS_CROHN_M_EVER                   | Lifetime occurrence of Crohn's disease in mother                          | C     | I     | I     | C     | C      | C      | I      | I     | C     | C     | C     | I     | 7 (58.3%)                             |
| DIS_CROHN_SIB_EVER                 | Lifetime occurrence of Crohn's disease in siblings                        | C     | I     | I     | C     | C      | C      | I      | I     | C     | C     | C     | I     | 7 (58.3%)                             |
| DIS_CROHN_SIB_NUM                  | Number of siblings with Crohn's disease                                   | C     | I     | I     | C     | C      | C      | I      | I     | C     | C     | C     | I     | 7 (58.3%)                             |
| DIS_IBS_AGE                        | Age at first diagnosis of irritable bowel syndrome                        | C     | C     | I     | C     | C      | C      | C      | I     | C     | C     | C     | C     | 10 (83.3%)                            |
| DIS_IBS_CHILD_EVER                 | Lifetime occurrence of irritable bowel syndrome in children               | C     | I     | I     | C     | C      | C      | I      | I     | C     | C     | C     | I     | 7 (58.3%)                             |
| DIS_IBS_CHILD_NUM                  | Number of children with irritable bowel syndrome                          | C     | I     | I     | C     | C      | C      | I      | I     | C     | C     | C     | I     | 7 (58.3%)                             |
| DIS_IBS_EVER                       | Lifetime occurrence of irritable bowel syndrome                           | C     | C     | C     | C     | C      | C      | C      | C     | C     | C     | C     | C     | 12 (100%)                             |
| DIS_IBS_FAM_EVER                   | Family history of irritable bowel syndrome                                | C     | I     | I     | C     | C      | C      | I      | I     | C     | C     | C     | I     | 7 (58.3%)                             |
| DIS_IBS_F_EVER                     | Lifetime occurrence of irritable bowel syndrome in father                 | C     | I     | I     | C     | C      | C      | I      | I     | C     | C     | C     | I     | 7 (58.3%)                             |
| DIS_IBS_M_EVER                     | Lifetime occurrence of irritable bowel syndrome in mother                 | C     | I     | I     | C     | C      | C      | I      | I     | C     | C     | C     | I     | 7 (58.3%)                             |
| DIS_IBS_SIB_EVER                   | Lifetime occurrence of irritable bowel syndrome in siblings               | C     | I     | I     | C     | C      | C      | I      | I     | C     | C     | C     | I     | 7 (58.3%)                             |
| DIS_IBS_SIB_NUM                    | Number of siblings with irritable bowel syndrome                          | C     | I     | I     | C     | C      | C      | I      | I     | C     | C     | C     | I     | 7 (58.3%)                             |
| DIS_LC_AGE                         | Age at first diagnosis of liver cirrhosis                                 | C     | C     | I     | C     | C      | C      | C      | I     | C     | C     | C     | C     | 10 (83.3%)                            |
| DIS_LC_CHILD_EVER                  | Lifetime occurrence of liver cirrhosis in children                        | C     | I     | I     | C     | C      | C      | I      | I     | C     | C     | C     | I     | 7 (58.3%)                             |
| DIS_LC_CHILD_NUM                   | Number of children with liver cirrhosis                                   | C     | I     | I     | C     | C      | C      | I      | I     | C     | C     | C     | I     | 7 (58.3%)                             |
| DIS_LC_EVER                        | Lifetime occurrence of liver cirrhosis                                    | C     | C     | C     | C     | C      | C      | C      | C     | C     | C     | C     | C     | 12 (100%)                             |
| DIS_LC_FAM_EVER                    | Family history of liver cirrhosis                                         | C     | I     | I     | C     | C      | C      | I      | I     | C     | C     | C     | I     | 7 (58.3%)                             |
| DIS_LC_F_EVER                      | Lifetime occurrence of liver cirrhosis in father                          | C     | I     | I     | C     | C      | C      | I      | I     | C     | C     | C     | I     | 7 (58.3%)                             |
| DIS_LC_M_EVER                      | Lifetime occurrence of liver cirrhosis in mother                          | C     | I     | I     | C     | C      | C      | I      | I     | C     | C     | C     | I     | 7 (58.3%)                             |
| DIS_LC_SIB_EVER                    | Lifetime occurrence of liver cirrhosis in siblings                        | C     | I     | I     | C     | C      | C      | I      | I     | C     | C     | C     | I     | 7 (58.3%)                             |
| DIS_LC_SIB_NUM                     | Number of siblings with liver cirrhosis                                   | C     | I     | I     | C     | C      | C      | I      | I     | C     | C     | C     | I     | 7 (58.3%)                             |
| DIS_UC_AGE                         | Age at first diagnosis of ulcerative colitis                              | C     | C     | I     | C     | C      | C      | C      | I     | C     | C     | C     | C     | 10 (83.3%)                            |
| DIS_UC_CHILD_EVER                  | Lifetime occurrence of ulcerative colitis in children                     | C     | I     | I     | C     | C      | C      | I      | I     | C     | C     | C     | I     | 7 (58.3%)                             |
| DIS_UC_CHILD_NUM                   | Number of children with ulcerative colitis                                | C     | I     | I     | C     | C      | C      | I      | I     | C     | C     | C     | I     | 7 (58.3%)                             |
| DIS_UC_EVER                        | Lifetime occurrence of ulcerative colitis                                 | C     | C     | C     | C     | C      | C      | C      | C     | C     | C     | C     | C     | 12 (100%)                             |
| DIS_UC_FAM_EVER                    | Family history of ulcerative colitis                                      | C     | I     | I     | C     | C      | C      | I      | I     | C     | C     | C     | I     | 7 (58.3%)                             |
| DIS_UC_F_EVER                      | Lifetime occurrence of ulcerative colitis in father                       | C     | I     | I     | C     | C      | C      | I      | I     | C     | C     | C     | I     | 7 (58.3%)                             |
| DIS_UC_M_EVER                      | Lifetime occurrence of ulcerative colitis in mother                       | C     | I     | I     | C     | C      | C      | I      | I     | C     | C     | C     | I     | 7 (58.3%)                             |
| DIS_UC_SIB_EVER                    | Lifetime occurrence of ulcerative colitis in siblings                     | C     | I     | I     | C     | C      | C      | I      | I     | C     | C     | C     | I     | 7 (58.3%)                             |
| DIS_UC_SIB_NUM                     | Number of siblings with ulcerative colitis                                | C     | I     | I     | C     | C      | C      | I      | I     | C     | C     | C     | I     | 7 (58.3%)                             |
| <b>Diseases-Circulatory system</b> |                                                                           |       |       |       |       |        |        |        |       |       |       |       |       |                                       |
| DIS_HBP_AGE                        | Age at first diagnosis of high blood pressure, excluding during pregnancy | C     | C     | C     | C     | C      | C      | C      | C     | C     | C     | C     | C     | 12 (100%)                             |
| DIS_HBP_CHILD_EVER                 | Lifetime occurrence of high blood pressure in children                    | C     | I     | I     | C     | C      | C      | C      | C     | C     | C     | C     | C     | 10 (83.3%)                            |
| DIS_HBP_CHILD_NUM                  | Number of children with high blood pressure                               | C     | I     | I     | C     | C      | C      | C      | C     | C     | C     | C     | C     | 10 (83.3%)                            |
| DIS_HBP_EVER                       | Lifetime occurrence of high blood pressure, excluding during pregnancy    | C     | C     | C     | C     | C      | C      | C      | C     | C     | C     | C     | C     | 12 (100%)                             |
| DIS_HBP_FAM_EVER                   | Family history of high blood pressure                                     | C     | I     | I     | C     | C      | C      | C      | C     | C     | C     | C     | C     | 10 (83.3%)                            |
| DIS_HBP_F_EVER                     | Lifetime occurrence of high blood pressure in father                      | C     | I     | I     | C     | C      | C      | C      | C     | C     | C     | C     | C     | 10 (83.3%)                            |
| DIS_HBP_M_EVER                     | Lifetime occurrence of high blood pressure in mother                      | C     | I     | I     | C     | C      | C      | C      | C     | C     | C     | C     | C     | 10 (83.3%)                            |
| DIS_HBP_SIB_EVER                   | Lifetime occurrence of high blood pressure in siblings                    | C     | I     | I     | C     | C      | C      | C      | C     | C     | C     | C     | C     | 10 (83.3%)                            |
| DIS_HBP_SIB_NUM                    | Number of siblings with high blood pressure                               | C     | I     | I     | C     | C      | C      | C      | C     | C     | C     | C     | C     | 10 (83.3%)                            |
| DIS_HBP_TX                         | Currently under treatment for high blood pressure                         | I     | C     | C     | I     | I      | I      | C      | C     | C     | I     | I     | I     | 5 (41.7%)                             |
| DIS_MI_AGE                         | Age at first diagnosis of myocardial infarction                           | C     | C     | C     | C     | C      | C      | C      | C     | C     | C     | C     | C     | 12 (100%)                             |
| DIS_MI_CHILD_EVER                  | Lifetime occurrence of myocardial infarction in children                  | C     | I     | C     | C     | C      | C      | C      | C     | C     | C     | C     | C     | 11 (91.7%)                            |
| DIS_MI_CHILD_NUM                   | Number of children with myocardial infarction                             | C     | I     | C     | C     | C      | C      | C      | C     | C     | C     | C     | C     | 11 (91.7%)                            |
| DIS_MI_EVER                        | Lifetime occurrence of myocardial infarction                              | C     | C     | C     | C     | C      | C      | C      | C     | C     | C     | C     | C     | 12 (100%)                             |
| DIS_MI_FAM_EVER                    | Family history of myocardial infarction                                   | C     | I     | C     | C     | C      | C      | C      | C     | C     | C     | C     | C     | 11 (91.7%)                            |
| DIS_MI_F_EVER                      | Lifetime occurrence of myocardial infarction in father                    | C     | I     | C     | C     | C      | C      | C      | C     | C     | C     | C     | C     | 11 (91.7%)                            |
| DIS_MI_M_EVER                      | Lifetime occurrence of myocardial infarction in mother                    | C     | I     | C     | C     | C      | C      | C      | C     | C     | C     | C     | C     | 11 (91.7%)                            |
| DIS_MI_SIB_EVER                    | Lifetime occurrence of myocardial infarction in siblings                  | C     | I     | C     | C     | C      | C      | C      | C     | C     | C     | C     | C     | 11 (91.7%)                            |
| DIS_MI_SIB_NUM                     | Number of siblings with myocardial infarction                             | C     | I     | C     | C     | C      | C      | C      | C     | C     | C     | C     | C     | 11 (91.7%)                            |
| DIS_MI_TX                          | Currently under treatment for myocardial infarction                       | I     | C     | C     | I     | I      | I      | C      | C     | I     | I     | I     | I     | 4 (33.3%)                             |
| DIS_STROKE_AGE                     | Age at first diagnosis of stroke                                          | C     | C     | C     | C     | C      | C      | C      | C     | C     | C     | C     | C     | 12 (100%)                             |

Appendix 2 (as supplied by the authors): Harmonization potential of the Health and Risk Factor Questionnaire variables (Version 2.0 - Oct. 2017)

| Variable                        | label                                                                          | ATL-1 | ATL-2 | ATP-1 | ATP-2 | BCGP-1 | BCGP-2 | BCGP-3 | CAG-1 | CAG-2 | OHS-1 | OHS-2 | OHS-3 | Variable with a complete status n (%) |
|---------------------------------|--------------------------------------------------------------------------------|-------|-------|-------|-------|--------|--------|--------|-------|-------|-------|-------|-------|---------------------------------------|
| DIS_STROKE_CHILD_EVER           | Lifetime occurrence of stroke in children                                      | C     | I     | C     | C     | C      | C      | C      | C     | C     | C     | C     | C     | 11 (91.7%)                            |
| DIS_STROKE_CHILD_NUM            | Number of children with stroke                                                 | C     | I     | C     | C     | C      | C      | C      | C     | C     | C     | C     | C     | 11 (91.7%)                            |
| DIS_STROKE_EVER                 | Lifetime occurrence of stroke                                                  | C     | C     | C     | C     | C      | C      | C      | C     | C     | C     | C     | C     | 12 (100%)                             |
| DIS_STROKE_FAM_EVER             | Family history of stroke                                                       | C     | I     | C     | C     | C      | C      | C      | C     | C     | C     | C     | C     | 11 (91.7%)                            |
| DIS_STROKE_F_EVER               | Lifetime occurrence of stroke in father                                        | C     | I     | C     | C     | C      | C      | C      | C     | C     | C     | C     | C     | 11 (91.7%)                            |
| DIS_STROKE_M_EVER               | Lifetime occurrence of stroke in mother                                        | C     | I     | C     | C     | C      | C      | C      | C     | C     | C     | C     | C     | 11 (91.7%)                            |
| DIS_STROKE_SIB_EVER             | Lifetime occurrence of stroke in siblings                                      | C     | I     | C     | C     | C      | C      | C      | C     | C     | C     | C     | C     | 11 (91.7%)                            |
| DIS_STROKE_SIB_NUM              | Number of siblings with stroke                                                 | C     | I     | C     | C     | C      | C      | C      | C     | C     | C     | C     | C     | 11 (91.7%)                            |
| DIS_STROKE_TX                   | Currently under treatment for stroke                                           | I     | C     | C     | C     | I      | I      | C      | C     | I     | I     | I     | I     | 4 (33.3%)                             |
| <b>Diseases-Nervous system</b>  |                                                                                |       |       |       |       |        |        |        |       |       |       |       |       |                                       |
| DIS_MS_AGE                      | Age at first diagnosis of multiple sclerosis                                   | C     | C     | I     | C     | C      | C      | C      | I     | C     | C     | C     | C     | 10 (83.3%)                            |
| DIS_MS_CHILD_EVER               | Lifetime occurrence of multiple sclerosis in children                          | C     | I     | I     | C     | C      | C      | I      | I     | C     | C     | C     | I     | 7 (58.3%)                             |
| DIS_MS_CHILD_NUM                | Number of children with multiple sclerosis                                     | C     | I     | I     | C     | C      | C      | I      | I     | C     | C     | C     | I     | 7 (58.3%)                             |
| DIS_MS_EVER                     | Lifetime occurrence of multiple sclerosis                                      | C     | C     | C     | C     | C      | C      | C      | C     | C     | C     | C     | C     | 12 (100%)                             |
| DIS_MS_FAM_EVER                 | Family history of multiple sclerosis                                           | C     | I     | I     | C     | C      | C      | I      | I     | C     | C     | C     | I     | 7 (58.3%)                             |
| DIS_MS_F_EVER                   | Lifetime occurrence of multiple sclerosis in father                            | C     | I     | I     | C     | C      | C      | I      | I     | C     | C     | C     | I     | 7 (58.3%)                             |
| DIS_MS_M_EVER                   | Lifetime occurrence of multiple sclerosis in mother                            | C     | I     | I     | C     | C      | C      | I      | I     | C     | C     | C     | I     | 7 (58.3%)                             |
| DIS_MS_SIB_EVER                 | Lifetime occurrence of multiple sclerosis in siblings                          | C     | I     | I     | C     | C      | C      | I      | I     | C     | C     | C     | I     | 7 (58.3%)                             |
| DIS_MS_SIB_NUM                  | Number of siblings with multiple sclerosis                                     | C     | I     | I     | C     | C      | C      | I      | I     | C     | C     | C     | I     | 7 (58.3%)                             |
| <b>Diseases-Mental behavior</b> |                                                                                |       |       |       |       |        |        |        |       |       |       |       |       |                                       |
| DIS_DEP_AGE                     | Age at first diagnosis of major depression onset                               | C     | I     | I     | C     | C      | C      | I      | I     | C     | C     | C     | I     | 7 (58.3%)                             |
| DIS_DEP_CHILD_EVER              | Lifetime occurrence of major depression in children                            | C     | I     | I     | C     | C      | C      | C      | I     | C     | C     | C     | C     | 9 (75%)                               |
| DIS_DEP_CHILD_NUM               | Number of children with major depression                                       | C     | I     | I     | C     | C      | C      | C      | I     | C     | C     | C     | C     | 9 (75%)                               |
| DIS_DEP_EVER                    | Lifetime occurrence of major depression                                        | C     | I     | I     | C     | C      | C      | I      | C     | C     | C     | C     | I     | 8 (66.7%)                             |
| DIS_DEP_FAM_EVER                | Family history of major depression                                             | C     | I     | I     | C     | C      | C      | C      | I     | C     | C     | C     | C     | 10 (83.3%)                            |
| DIS_DEP_F_EVER                  | Lifetime occurrence of major depression in father                              | C     | I     | I     | C     | C      | C      | I      | I     | C     | C     | C     | C     | 9 (75%)                               |
| DIS_DEP_M_EVER                  | Lifetime occurrence of major depression in mother                              | C     | I     | I     | C     | C      | C      | I      | I     | C     | C     | C     | C     | 9 (75%)                               |
| DIS_DEP_SIB_EVER                | Lifetime occurrence of major depression in siblings                            | C     | I     | I     | C     | C      | C      | I      | I     | C     | C     | C     | C     | 9 (75%)                               |
| DIS_DEP_SIB_NUM                 | Number of siblings with major depression                                       | C     | I     | I     | C     | C      | C      | I      | I     | C     | C     | C     | C     | 9 (75%)                               |
| <b>Diseases-Musculoskeletal</b> |                                                                                |       |       |       |       |        |        |        |       |       |       |       |       |                                       |
| DIS_ARTHRITIS_AGE               | Age at first diagnosis of arthritis                                            | C     | C     | I     | C     | C      | C      | C      | I     | C     | C     | C     | C     | 10 (83.3%)                            |
| DIS_ARTHRITIS_CHILD_EVER        | Lifetime occurrence of arthritis in children                                   | C     | I     | I     | C     | C      | C      | C      | I     | C     | C     | C     | C     | 9 (75%)                               |
| DIS_ARTHRITIS_CHILD_NUM         | Number of children with arthritis                                              | C     | I     | I     | C     | C      | C      | C      | I     | C     | C     | C     | C     | 9 (75%)                               |
| DIS_ARTHRITIS_EVER              | Lifetime occurrence of arthritis                                               | C     | C     | C     | C     | C      | C      | C      | C     | C     | C     | C     | C     | 12 (100%)                             |
| DIS_ARTHRITIS_FAM_EVER          | Family history of arthritis                                                    | C     | I     | I     | C     | C      | C      | C      | I     | C     | C     | C     | C     | 9 (75%)                               |
| DIS_ARTHRITIS_F_EVER            | Lifetime occurrence of arthritis in father                                     | C     | I     | I     | C     | C      | C      | C      | I     | C     | C     | C     | C     | 9 (75%)                               |
| DIS_ARTHRITIS_M_EVER            | Lifetime occurrence of arthritis in mother                                     | C     | I     | I     | C     | C      | C      | C      | I     | C     | C     | C     | C     | 9 (75%)                               |
| DIS_ARTHRITIS_SIB_EVER          | Lifetime occurrence of arthritis in siblings                                   | C     | I     | I     | C     | C      | C      | C      | I     | C     | C     | C     | C     | 9 (75%)                               |
| DIS_ARTHRITIS_SIB_NUM           | Number of siblings with arthritis                                              | C     | I     | I     | C     | C      | C      | C      | I     | C     | C     | C     | C     | 9 (75%)                               |
| DIS_ARTHRITIS_TYPE1             | Arthritis type (rheumatoid arthritis, osteoarthritis, other type of arthritis) | C     | C     | C     | C     | C      | C      | C      | C     | C     | C     | C     | C     | 12 (100%)                             |
| DIS_ARTHRITIS_TYPE2             | Arthritis type (rheumatoid arthritis, osteoarthritis, other type of arthritis) | C     | C     | C     | C     | I      | C      | C      | C     | I     | I     | C     | C     | 9 (75%)                               |
| DIS_ARTHRITIS_TYPE3             | Arthritis type (rheumatoid arthritis, osteoarthritis, other type of arthritis) | C     | C     | C     | C     | I      | C      | C      | C     | I     | I     | C     | C     | 9 (75%)                               |
| DIS_ARTHRITIS_TYPE_OTSP         | Lifetime occurrence of arthritis, other specify                                | C     | I     | C     | C     | C      | C      | I      | C     | C     | C     | C     | I     | 9 (75%)                               |
| DIS_OP_AGE                      | Age at first diagnosis of osteoporosis                                         | C     | C     | I     | C     | C      | C      | C      | I     | C     | C     | C     | C     | 10 (83.3%)                            |
| DIS_OP_CHILD_EVER               | Lifetime occurrence of osteoporosis in children                                | C     | I     | I     | C     | C      | C      | C      | I     | C     | C     | C     | I     | 8 (66.7%)                             |
| DIS_OP_CHILD_NUM                | Number of children with osteoporosis                                           | C     | I     | I     | C     | C      | C      | C      | I     | C     | C     | C     | I     | 8 (66.7%)                             |
| DIS_OP_EVER                     | Lifetime occurrence of osteoporosis                                            | C     | C     | C     | C     | C      | C      | C      | C     | C     | C     | C     | C     | 12 (100%)                             |
| DIS_OP_FAM_EVER                 | Family history of osteoporosis                                                 | C     | I     | I     | C     | C      | C      | C      | I     | C     | C     | C     | I     | 8 (66.7%)                             |
| DIS_OP_F_EVER                   | Lifetime occurrence of osteoporosis in father                                  | C     | I     | I     | C     | C      | C      | C      | I     | C     | C     | C     | I     | 8 (66.7%)                             |
| DIS_OP_M_EVER                   | Lifetime occurrence of osteoporosis in mother                                  | C     | I     | I     | C     | C      | C      | C      | I     | C     | C     | C     | I     | 8 (66.7%)                             |
| DIS_OP_SIB_EVER                 | Lifetime occurrence of osteoporosis in siblings                                | C     | I     | I     | C     | C      | C      | C      | I     | C     | C     | C     | I     | 8 (66.7%)                             |
| DIS_OP_SIB_NUM                  | Number of siblings with osteoporosis                                           | C     | I     | I     | C     | C      | C      | C      | I     | C     | C     | C     | I     | 8 (66.7%)                             |
| DIS_SLE_AGE                     | Age at first diagnosis of systemic lupus erythematosus                         | C     | C     | I     | C     | C      | C      | C      | I     | C     | C     | C     | C     | 10 (83.3%)                            |
| DIS_SLE_CHILD_EVER              | Lifetime occurrence of systemic lupus erythematosus in children                | C     | I     | I     | C     | C      | C      | I      | I     | C     | C     | C     | I     | 7 (58.3%)                             |
| DIS_SLE_CHILD_NUM               | Number of children with systemic lupus erythematosus                           | C     | I     | I     | C     | C      | C      | I      | I     | C     | C     | C     | I     | 7 (58.3%)                             |
| DIS_SLE_EVER                    | Lifetime occurrence of systemic lupus erythematosus                            | C     | C     | C     | C     | C      | C      | C      | C     | C     | C     | C     | C     | 12 (100%)                             |
| DIS_SLE_FAM_EVER                | Family history of systemic lupus erythematosus                                 | C     | I     | I     | C     | C      | C      | I      | I     | C     | C     | C     | I     | 7 (58.3%)                             |
| DIS_SLE_F_EVER                  | Lifetime occurrence of systemic lupus erythematosus in father                  | C     | I     | I     | C     | C      | C      | I      | I     | C     | C     | C     | I     | 7 (58.3%)                             |
| DIS_SLE_M_EVER                  | Lifetime occurrence of systemic lupus erythematosus in mother                  | C     | I     | I     | C     | C      | C      | I      | I     | C     | C     | C     | I     | 7 (58.3%)                             |
| DIS_SLE_SIB_EVER                | Lifetime occurrence of systemic lupus erythematosus in siblings                | C     | I     | I     | C     | C      | C      | I      | I     | C     | C     | C     | I     | 7 (58.3%)                             |
| DIS_SLE_SIB_NUM                 | Number of siblings with systemic lupus erythematosus                           | C     | I     | I     | C     | C      | C      | I      | I     | C     | C     | C     | I     | 7 (58.3%)                             |



Appendix 2 (as supplied by the authors): Harmonization potential of the Health and Risk Factor Questionnaire variables (Version 2.0 - Oct. 2017)

| Variable                            | label                                                                    | ATL-1 | ATL-2 | ATP-1 | ATP-2 | BCGP-1 | BCGP-2 | BCGP-3 | CAG-1 | CAG-2 | OHS-1 | OHS-2 | OHS-3 | Variable with a complete status n (%) |
|-------------------------------------|--------------------------------------------------------------------------|-------|-------|-------|-------|--------|--------|--------|-------|-------|-------|-------|-------|---------------------------------------|
| <b>Diseases-Endocrine metabolic</b> |                                                                          |       |       |       |       |        |        |        |       |       |       |       |       |                                       |
| DIS_DIAB_AGE                        | Age at first diagnosis of diabetes                                       | C     | C     | C     | C     | C      | C      | C      | C     | C     | C     | C     | C     | 12 (100%)                             |
| DIS_DIAB_CHILD_EVER                 | Lifetime occurrence of diabetes in children                              | C     | I     | C     | C     | C      | C      | C      | C     | C     | C     | C     | C     | 11 (91.7%)                            |
| DIS_DIAB_CHILD_NUM                  | Number of children with diabetes                                         | C     | I     | C     | C     | C      | C      | C      | C     | C     | C     | C     | C     | 11 (91.7%)                            |
| DIS_DIAB_EVER                       | Lifetime occurrence of diabetes                                          | C     | C     | C     | C     | C      | C      | C      | C     | C     | C     | C     | C     | 12 (100%)                             |
| DIS_DIAB_FAM_EVER                   | Family history of diabetes                                               | C     | I     | C     | C     | C      | C      | C      | C     | C     | C     | C     | C     | 11 (91.7%)                            |
| DIS_DIAB_F_EVER                     | Lifetime occurrence of diabetes in father                                | C     | I     | C     | C     | C      | C      | C      | C     | C     | C     | C     | C     | 11 (91.7%)                            |
| DIS_DIAB_M_EVER                     | Lifetime occurrence of diabetes in mother                                | C     | I     | C     | C     | C      | C      | C      | C     | C     | C     | C     | C     | 11 (91.7%)                            |
| DIS_DIAB_SIB_EVER                   | Lifetime occurrence of diabetes in siblings                              | C     | I     | C     | C     | C      | C      | C      | C     | C     | C     | C     | C     | 11 (91.7%)                            |
| DIS_DIAB_SIB_NUM                    | Number of siblings with diabetes                                         | C     | I     | C     | C     | C      | C      | C      | C     | C     | C     | C     | C     | 11 (91.7%)                            |
| DIS_DIAB_TX                         | Currently under treatment for diabetes                                   | I     | C     | C     | I     | I      | I      | C      | C     | I     | I     | I     | I     | 4 (33.3%)                             |
| DIS_DIAB_TYPE                       | Lifetime diabetes type                                                   | C     | C     | C     | C     | C      | C      | C      | C     | C     | C     | C     | C     | 12 (100%)                             |
| <b>Diseases-Respiratory system</b>  |                                                                          |       |       |       |       |        |        |        |       |       |       |       |       |                                       |
| DIS_ASTHMA_AGE                      | Age at first diagnosis of asthma                                         | C     | C     | C     | C     | C      | C      | C      | C     | C     | C     | C     | C     | 12 (100%)                             |
| DIS_ASTHMA_CHILD_EVER               | Lifetime occurrence of asthma in children                                | C     | I     | I     | C     | C      | C      | C      | I     | C     | C     | C     | C     | 9 (75%)                               |
| DIS_ASTHMA_CHILD_NUM                | Number of children with asthma                                           | C     | I     | I     | C     | C      | C      | C      | I     | C     | C     | C     | C     | 9 (75%)                               |
| DIS_ASTHMA_EVER                     | Lifetime occurrence of asthma                                            | C     | C     | C     | C     | C      | C      | C      | C     | C     | C     | C     | C     | 12 (100%)                             |
| DIS_ASTHMA_FAM_EVER                 | Family history of asthma                                                 | C     | I     | I     | C     | C      | C      | C      | C     | C     | C     | C     | C     | 10 (83.3%)                            |
| DIS_ASTHMA_F_EVER                   | Lifetime occurrence of asthma in father                                  | C     | I     | I     | C     | C      | C      | C      | I     | C     | C     | C     | C     | 9 (75%)                               |
| DIS_ASTHMA_M_EVER                   | Lifetime occurrence of asthma in mother                                  | C     | I     | I     | C     | C      | C      | C      | I     | C     | C     | C     | C     | 9 (75%)                               |
| DIS_ASTHMA_SIB_EVER                 | Lifetime occurrence of asthma in siblings                                | C     | I     | I     | C     | C      | C      | C      | I     | C     | C     | C     | C     | 9 (75%)                               |
| DIS_ASTHMA_SIB_NUM                  | Number of siblings with asthma                                           | C     | I     | I     | C     | C      | C      | C      | I     | C     | C     | C     | C     | 9 (75%)                               |
| DIS_ASTHMA_TX                       | Currently under treatment for asthma                                     | I     | C     | C     | I     | I      | I      | C      | C     | I     | I     | I     | I     | 4 (33.3%)                             |
| DIS_CB_AGE                          | Age at first diagnosis of chronic bronchitis                             | I     | C     | C     | I     | I      | I      | C      | C     | C     | I     | C     | C     | 7 (58.3%)                             |
| DIS_CB_CHILD_EVER                   | Lifetime occurrence of chronic bronchitis in children                    | I     | I     | I     | I     | I      | I      | C      | I     | C     | I     | C     | C     | 4 (33.3%)                             |
| DIS_CB_CHILD_NUM                    | Number of children with chronic bronchitis                               | I     | I     | I     | I     | I      | I      | C      | I     | C     | I     | C     | C     | 4 (33.3%)                             |
| DIS_CB_EVER                         | Lifetime occurrence of chronic bronchitis                                | I     | C     | C     | I     | I      | I      | C      | C     | C     | I     | C     | C     | 7 (58.3%)                             |
| DIS_CB_FAM_EVER                     | Family history of chronic bronchitis                                     | I     | I     | I     | I     | I      | I      | C      | I     | C     | I     | C     | C     | 4 (33.3%)                             |
| DIS_CB_F_EVER                       | Lifetime occurrence of chronic bronchitis in father                      | I     | I     | I     | I     | I      | I      | C      | I     | C     | I     | C     | C     | 4 (33.3%)                             |
| DIS_CB_M_EVER                       | Lifetime occurrence of chronic bronchitis in mother                      | I     | I     | I     | I     | I      | I      | C      | I     | C     | I     | C     | C     | 4 (33.3%)                             |
| DIS_CB_SIB_EVER                     | Lifetime occurrence of chronic bronchitis in siblings                    | I     | I     | I     | I     | I      | I      | C      | I     | C     | I     | C     | C     | 4 (33.3%)                             |
| DIS_CB_SIB_NUM                      | Number of siblings with chronic bronchitis                               | I     | I     | I     | I     | I      | I      | C      | I     | C     | I     | C     | C     | 4 (33.3%)                             |
| DIS_CB_TX                           | Currently under treatment for chronic bronchitis                         | I     | C     | C     | I     | I      | I      | C      | C     | I     | I     | I     | I     | 4 (33.3%)                             |
| DIS_COPD_AGE                        | Age at first diagnosis of chronic obstructive pulmonary disease          | C     | C     | I     | C     | C      | C      | C      | I     | C     | C     | C     | C     | 10 (83.3%)                            |
| DIS_COPD_CHILD_EVER                 | Lifetime occurrence of chronic obstructive pulmonary disease in children | C     | I     | C     | C     | C      | C      | C      | C     | C     | C     | C     | C     | 11 (91.7%)                            |
| DIS_COPD_CHILD_NUM                  | Number of children with chronic obstructive pulmonary disease            | C     | I     | C     | C     | C      | C      | C      | C     | C     | C     | C     | C     | 11 (91.7%)                            |
| DIS_COPD_EVER                       | Lifetime occurrence of chronic obstructive pulmonary disease             | C     | C     | I     | C     | C      | C      | C      | I     | C     | C     | C     | C     | 10 (83.3%)                            |
| DIS_COPD_FAM_EVER                   | Family history of chronic obstructive pulmonary disease                  | C     | I     | C     | C     | C      | C      | C      | C     | C     | C     | C     | C     | 11 (91.7%)                            |
| DIS_COPD_F_EVER                     | Lifetime occurrence of chronic obstructive pulmonary disease in father   | C     | I     | C     | C     | C      | C      | C      | C     | C     | C     | C     | C     | 11 (91.7%)                            |
| DIS_COPD_M_EVER                     | Lifetime occurrence of chronic obstructive pulmonary disease in mother   | C     | I     | C     | C     | C      | C      | C      | C     | C     | C     | C     | C     | 11 (91.7%)                            |
| DIS_COPD_SIB_EVER                   | Lifetime occurrence of chronic obstructive pulmonary disease in siblings | C     | I     | C     | C     | C      | C      | C      | C     | C     | C     | C     | C     | 11 (91.7%)                            |
| DIS_COPD_SIB_NUM                    | Number of siblings with chronic obstructive pulmonary disease            | C     | I     | C     | C     | C      | C      | C      | C     | C     | C     | C     | C     | 11 (91.7%)                            |
| DIS_COPD_TX                         | Currently under treatment for chronic obstructive pulmonary disease      | I     | C     | I     | I     | I      | I      | C      | I     | I     | I     | I     | I     | 2 (16.7%)                             |
| DIS_EMPHYSEMA_AGE                   | Age at first diagnosis of emphysema                                      | I     | C     | C     | I     | I      | I      | C      | C     | C     | I     | C     | C     | 7 (58.3%)                             |
| DIS_EMPHYSEMA_CHILD_EVER            | Lifetime occurrence of emphysema in children                             | I     | I     | I     | I     | I      | I      | I      | I     | C     | I     | C     | I     | 2 (16.7%)                             |
| DIS_EMPHYSEMA_CHILD_NUM             | Number of children with emphysema                                        | I     | I     | I     | I     | I      | I      | I      | I     | C     | I     | C     | I     | 2 (16.7%)                             |
| DIS_EMPHYSEMA_EVER                  | Lifetime occurrence of emphysema                                         | I     | C     | C     | I     | I      | I      | C      | C     | C     | I     | C     | C     | 7 (58.3%)                             |
| DIS_EMPHYSEMA_FAM_EVER              | Family history of emphysema                                              | I     | I     | I     | I     | I      | I      | I      | I     | C     | I     | C     | I     | 2 (16.7%)                             |
| DIS_EMPHYSEMA_F_EVER                | Lifetime occurrence of emphysema in father                               | I     | I     | I     | I     | I      | I      | I      | I     | C     | I     | C     | I     | 2 (16.7%)                             |
| DIS_EMPHYSEMA_M_EVER                | Lifetime occurrence of emphysema in mother                               | I     | I     | I     | I     | I      | I      | I      | I     | C     | I     | C     | I     | 2 (16.7%)                             |
| DIS_EMPHYSEMA_SIB_EVER              | Lifetime occurrence of emphysema in siblings                             | I     | I     | I     | I     | I      | I      | I      | I     | C     | I     | C     | I     | 2 (16.7%)                             |
| DIS_EMPHYSEMA_SIB_NUM               | Number of siblings with emphysema                                        | I     | I     | I     | I     | I      | I      | I      | I     | C     | I     | C     | I     | 2 (16.7%)                             |
| DIS_EMPHYSEMA_TX                    | Currently under treatment for emphysema                                  | I     | C     | C     | I     | I      | I      | C      | C     | I     | I     | I     | I     | 4 (33.3%)                             |
| <b>Diseases-Skin subcutaneous</b>   |                                                                          |       |       |       |       |        |        |        |       |       |       |       |       |                                       |
| DIS_ECZEMA_AGE                      | Age at first diagnosis of eczema                                         | C     | C     | I     | C     | C      | C      | C      | I     | C     | C     | C     | C     | 10 (83.3%)                            |
| DIS_ECZEMA_CHILD_EVER               | Lifetime occurrence of eczema in children                                | C     | I     | I     | C     | C      | C      | C      | I     | C     | C     | C     | I     | 7 (58.3%)                             |
| DIS_ECZEMA_CHILD_NUM                | Number of children with eczema                                           | C     | I     | I     | C     | C      | C      | C      | I     | C     | C     | C     | I     | 7 (58.3%)                             |
| DIS_ECZEMA_EVER                     | Lifetime occurrence of eczema                                            | C     | C     | C     | C     | C      | C      | C      | C     | C     | C     | C     | C     | 12 (100%)                             |
| DIS_ECZEMA_FAM_EVER                 | Family history of eczema                                                 | C     | I     | I     | C     | C      | C      | C      | I     | C     | C     | C     | I     | 7 (58.3%)                             |
| DIS_ECZEMA_F_EVER                   | Lifetime occurrence of eczema in father                                  | C     | I     | I     | C     | C      | C      | C      | I     | C     | C     | C     | I     | 7 (58.3%)                             |
| DIS_ECZEMA_M_EVER                   | Lifetime occurrence of eczema in mother                                  | C     | I     | I     | C     | C      | C      | C      | I     | C     | C     | C     | I     | 7 (58.3%)                             |
| DIS_ECZEMA_SIB_EVER                 | Lifetime occurrence of eczema in siblings                                | C     | I     | I     | C     | C      | C      | C      | I     | C     | C     | C     | I     | 7 (58.3%)                             |
| DIS_ECZEMA_SIB_NUM                  | Number of siblings with eczema                                           | C     | I     | I     | C     | C      | C      | C      | I     | C     | C     | C     | I     | 7 (58.3%)                             |
| DIS_PS_AGE                          | Age at first diagnosis of psoriasis                                      | C     | C     | I     | C     | C      | C      | C      | C     | C     | C     | C     | C     | 10 (83.3%)                            |

Appendix 2 (as supplied by the authors): Harmonization potential of the Health and Risk Factor Questionnaire variables (Version 2.0 - Oct. 2017)

| Variable                                                                         | label                                                                  | ATL-1 | ATL-2 | ATP-1 | ATP-2 | BCGP-1 | BCGP-2 | BCGP-3 | CAG-1 | CAG-2 | OHS-1 | OHS-2 | OHS-3 | Variable with a complete status n (%) |
|----------------------------------------------------------------------------------|------------------------------------------------------------------------|-------|-------|-------|-------|--------|--------|--------|-------|-------|-------|-------|-------|---------------------------------------|
| DIS_PS_CHILD_EVER                                                                | Lifetime occurrence of psoriasis in children                           | C     | I     | I     | C     | C      | C      | I      | I     | C     | C     | C     | I     | 7 (58.3%)                             |
| DIS_PS_CHILD_NUM                                                                 | Number of children with psoriasis                                      | C     | I     | I     | C     | C      | C      | I      | I     | C     | C     | C     | I     | 7 (58.3%)                             |
| DIS_PS_EVER                                                                      | Lifetime occurrence of psoriasis                                       | C     | C     | C     | C     | C      | C      | C      | C     | C     | C     | C     | C     | 12 (100%)                             |
| DIS_PS_FAM_EVER                                                                  | Family history of psoriasis                                            | C     | I     | I     | C     | C      | C      | I      | I     | C     | C     | C     | I     | 7 (58.3%)                             |
| DIS_PS_F_EVER                                                                    | Lifetime occurrence of psoriasis in father                             | C     | I     | I     | C     | C      | C      | I      | I     | C     | C     | C     | I     | 7 (58.3%)                             |
| DIS_PS_M_EVER                                                                    | Lifetime occurrence of psoriasis in mother                             | C     | I     | I     | C     | C      | C      | I      | I     | C     | C     | C     | I     | 7 (58.3%)                             |
| DIS_PS_SIB_EVER                                                                  | Lifetime occurrence of psoriasis in siblings                           | C     | I     | I     | C     | C      | C      | I      | I     | C     | C     | C     | I     | 7 (58.3%)                             |
| DIS_PS_SIB_NUM                                                                   | Number of siblings with psoriasis                                      | C     | I     | I     | C     | C      | C      | I      | I     | C     | C     | C     | I     | 7 (58.3%)                             |
| <b>Medication supplements</b>                                                    |                                                                        |       |       |       |       |        |        |        |       |       |       |       |       |                                       |
| ATC_1                                                                            | Chemical substance, 5th level of ATC classification - medication 1     | C     | C     | C     | C     | C      | C      | C      | I     | C     | C     | C     | C     | 11 (91.7%)                            |
| ATC_1_L1                                                                         | Anatomical main group, 1st level of ATC classification - medication 1  | C     | C     | C     | C     | C      | C      | C      | C     | C     | C     | C     | C     | 12 (100%)                             |
| ATC_1_L1                                                                         | Anatomical main group, 1st level of ATC classification - medication 1  | C     | C     | C     | C     | C      | C      | C      | C     | C     | C     | C     | C     | 12 (100%)                             |
| ATC_2                                                                            | Chemical substance, 5th level of ATC classification - medication 2     | C     | C     | C     | C     | C      | C      | C      | I     | C     | C     | C     | C     | 11 (91.7%)                            |
| ATC_2_L1                                                                         | Anatomical main group, 1st level of ATC classification - medication 2  | C     | C     | C     | C     | C      | C      | C      | C     | C     | C     | C     | C     | 12 (100%)                             |
| ATC_3                                                                            | Chemical substance, 5th level of ATC classification - medication 3     | C     | C     | C     | C     | C      | C      | C      | I     | C     | C     | C     | C     | 11 (91.7%)                            |
| ATC_3_L1                                                                         | Anatomical main group, 1st level of ATC classification - medication 3  | C     | C     | C     | C     | C      | C      | C      | C     | C     | C     | C     | C     | 12 (100%)                             |
| ATC_4                                                                            | Chemical substance, 5th level of ATC classification - medication 4     | C     | C     | C     | C     | C      | C      | C      | I     | C     | C     | C     | C     | 11 (91.7%)                            |
| ATC_4_L1                                                                         | Anatomical main group, 1st level of ATC classification - medication 4  | C     | C     | C     | C     | C      | C      | C      | C     | C     | C     | C     | C     | 12 (100%)                             |
| ATC_5                                                                            | Chemical substance, 5th level of ATC classification - medication 5     | C     | C     | C     | C     | C      | C      | C      | I     | C     | C     | C     | C     | 11 (91.7%)                            |
| ATC_5_L1                                                                         | Anatomical main group, 1st level of ATC classification - medication 5  | C     | C     | C     | C     | C      | C      | C      | C     | C     | C     | C     | C     | 12 (100%)                             |
| ATC_6                                                                            | Chemical substance, 5th level of ATC classification - medication 6     | C     | C     | C     | C     | C      | C      | C      | I     | C     | C     | C     | C     | 11 (91.7%)                            |
| ATC_6_L1                                                                         | Anatomical main group, 1st level of ATC classification - medication 6  | C     | C     | C     | C     | C      | C      | C      | C     | C     | C     | C     | C     | 12 (100%)                             |
| ATC_7                                                                            | Chemical substance, 5th level of ATC classification - medication 7     | C     | C     | C     | C     | C      | C      | C      | I     | C     | C     | C     | C     | 11 (91.7%)                            |
| ATC_7_L1                                                                         | Anatomical main group, 1st level of ATC classification - medication 7  | C     | C     | C     | C     | C      | C      | C      | C     | C     | C     | C     | C     | 12 (100%)                             |
| ATC_8                                                                            | Chemical substance, 5th level of ATC classification - medication 8     | C     | C     | C     | C     | C      | C      | C      | I     | C     | C     | C     | C     | 11 (91.7%)                            |
| ATC_8_L1                                                                         | Anatomical main group, 1st level of ATC classification - medication 8  | C     | C     | C     | C     | C      | C      | C      | C     | C     | C     | C     | C     | 12 (100%)                             |
| ATC_9                                                                            | Chemical substance, 5th level of ATC classification - medication 9     | C     | C     | C     | C     | C      | C      | C      | I     | C     | C     | C     | C     | 11 (91.7%)                            |
| ATC_9_L1                                                                         | Anatomical main group, 1st level of ATC classification - medication 9  | C     | C     | C     | C     | C      | C      | C      | C     | C     | C     | C     | C     | 12 (100%)                             |
| ATC_10                                                                           | Chemical substance, 5th level of ATC classification - medication 10    | C     | C     | C     | C     | C      | C      | C      | I     | C     | C     | C     | C     | 11 (91.7%)                            |
| ATC_10_L1                                                                        | Anatomical main group, 1st level of ATC classification - medication 10 | C     | C     | C     | C     | C      | C      | C      | C     | C     | C     | C     | C     | 12 (100%)                             |
| DIN_1                                                                            | Drug identification number (DIN) - medication 1                        | C     | C     | C     | C     | C      | C      | C      | I     | C     | C     | C     | C     | 11 (91.7%)                            |
| DIN_2                                                                            | Drug identification number (DIN) - medication 2                        | C     | C     | C     | C     | C      | C      | C      | I     | C     | C     | C     | C     | 11 (91.7%)                            |
| DIN_3                                                                            | Drug identification number (DIN) - medication 3                        | C     | C     | C     | C     | C      | C      | C      | I     | C     | C     | C     | C     | 11 (91.7%)                            |
| DIN_4                                                                            | Drug identification number (DIN) - medication 4                        | C     | C     | C     | C     | C      | C      | C      | I     | C     | C     | C     | C     | 11 (91.7%)                            |
| DIN_5                                                                            | Drug identification number (DIN) - medication 5                        | C     | C     | C     | C     | C      | C      | C      | I     | C     | C     | C     | C     | 11 (91.7%)                            |
| DIN_6                                                                            | Drug identification number (DIN) - medication 6                        | C     | C     | C     | C     | C      | C      | C      | I     | C     | C     | C     | C     | 11 (91.7%)                            |
| DIN_7                                                                            | Drug identification number (DIN) - medication 7                        | C     | C     | C     | C     | C      | C      | C      | I     | C     | C     | C     | C     | 11 (91.7%)                            |
| DIN_8                                                                            | Drug identification number (DIN) - medication 8                        | C     | C     | C     | C     | C      | C      | C      | I     | C     | C     | C     | C     | 11 (91.7%)                            |
| DIN_9                                                                            | Drug identification number (DIN) - medication 9                        | C     | C     | C     | C     | C      | C      | C      | I     | C     | C     | C     | C     | 11 (91.7%)                            |
| DIN_10                                                                           | Drug identification number (DIN) - medication 10                       | C     | C     | C     | C     | C      | C      | C      | I     | C     | C     | C     | C     | 11 (91.7%)                            |
| MED_1                                                                            | Name - medication 1                                                    | C     | C     | C     | C     | C      | C      | C      | C     | C     | C     | C     | C     | 12 (100%)                             |
| MED_2                                                                            | Name - medication 2                                                    | C     | C     | C     | C     | C      | C      | C      | C     | C     | C     | C     | C     | 12 (100%)                             |
| MED_3                                                                            | Name - medication 3                                                    | C     | C     | C     | C     | C      | C      | C      | C     | C     | C     | C     | C     | 12 (100%)                             |
| MED_4                                                                            | Name - medication 4                                                    | C     | C     | C     | C     | C      | C      | C      | C     | C     | C     | C     | C     | 12 (100%)                             |
| MED_5                                                                            | Name - medication 5                                                    | C     | C     | C     | C     | C      | C      | C      | C     | C     | C     | C     | C     | 12 (100%)                             |
| MED_6                                                                            | Name - medication 6                                                    | C     | C     | C     | C     | C      | C      | C      | C     | C     | C     | C     | C     | 12 (100%)                             |
| MED_7                                                                            | Name - medication 7                                                    | C     | C     | C     | C     | C      | C      | C      | C     | C     | C     | C     | C     | 12 (100%)                             |
| MED_8                                                                            | Name - medication 8                                                    | C     | C     | C     | C     | C      | C      | C      | C     | C     | C     | C     | C     | 12 (100%)                             |
| MED_9                                                                            | Name - medication 9                                                    | C     | C     | C     | C     | C      | C      | C      | C     | C     | C     | C     | C     | 12 (100%)                             |
| MED_10                                                                           | Name - medication 10                                                   | C     | C     | C     | C     | C      | C      | C      | C     | C     | C     | C     | C     | 12 (100%)                             |
| <b>Non pharmacological interventions-Other non-pharmacological interventions</b> |                                                                        |       |       |       |       |        |        |        |       |       |       |       |       |                                       |
| HS_COL_EVER                                                                      | Ever had colonoscopy                                                   | C     | I     | I     | C     | C      | C      | I      | I     | C     | C     | C     | I     | 7 (58.3%)                             |
| HS_COL_LAST                                                                      | Last colonoscopy                                                       | C     | I     | I     | C     | C      | C      | I      | I     | C     | C     | C     | I     | 7 (58.3%)                             |
| HS_SIG_COL_EVER                                                                  | Ever had sigmoidoscopy or colonoscopy                                  | C     | C     | C     | C     | C      | C      | C      | C     | C     | C     | C     | C     | 12 (100%)                             |
| HS_SIG_COL_LAST                                                                  | Last sigmoidoscopy or colonoscopy                                      | C     | C     | C     | C     | C      | C      | C      | C     | C     | C     | C     | C     | 12 (100%)                             |
| HS_SIG_EVER                                                                      | Ever had sigmoidoscopy                                                 | C     | I     | I     | C     | C      | C      | I      | I     | C     | C     | C     | I     | 7 (58.3%)                             |
| HS_SIG_LAST                                                                      | Last sigmoidoscopy                                                     | C     | I     | I     | C     | C      | C      | I      | I     | C     | C     | C     | I     | 7 (58.3%)                             |
| <b>Non pharmacological interventions-Surgical interventions</b>                  |                                                                        |       |       |       |       |        |        |        |       |       |       |       |       |                                       |
| WH_BI_OOPHORECTOMY                                                               | Bilateral oophorectomy                                                 | C     | I     | C     | C     | C      | C      | I      | C     | C     | C     | C     | C     | 10 (83.3%)                            |
| WH_HYSTERECTOMY_AGE                                                              | Hysterectomy onset                                                     | C     | C     | C     | C     | C      | C      | C      | I     | C     | C     | C     | C     | 10 (83.3%)                            |
| WH_HYSTERECTOMY_EVER                                                             | Occurrence of hysterectomy                                             | C     | C     | C     | C     | C      | C      | C      | I     | C     | C     | C     | C     | 10 (83.3%)                            |
| WH_OOPHORECTOMY_EVER                                                             | Occurrence of oophorectomy                                             | C     | C     | C     | C     | C      | C      | C      | C     | C     | C     | C     | C     | 12 (100%)                             |
| WH_OVARIES_LAST_AGE                                                              | Age at last oophorectomy                                               | C     | I     | C     | C     | C      | C      | I      | C     | C     | C     | C     | C     | 10 (83.3%)                            |
| WH_OVARIES_REMOVED_NB                                                            | Number of ovaries removed                                              | C     | C     | C     | C     | C      | C      | C      | C     | C     | C     | C     | C     | 12 (100%)                             |
| <b>Non pharmacological interventions-Biosample analyses</b>                      |                                                                        |       |       |       |       |        |        |        |       |       |       |       |       |                                       |
| HS_FOBT_EVER                                                                     | Ever had fecal occult blood test                                       | C     | C     | C     | C     | C      | C      | C      | C     | C     | C     | C     | C     | 12 (100%)                             |
| HS_FOBT_LAST                                                                     | Last fecal occult blood test                                           | C     | C     | C     | C     | C      | C      | C      | C     | C     | C     | C     | C     | 12 (100%)                             |
| HS_PAP_EVER                                                                      | Ever had Pap test                                                      | C     | C     | C     | C     | C      | C      | C      | C     | C     | C     | C     | C     | 12 (100%)                             |
| HS_PAP_LAST                                                                      | Last Pap test                                                          | C     | C     | C     | C     | C      | C      | C      | C     | C     | C     | C     | C     | 12 (100%)                             |
| HS_PSA_EVER                                                                      | Ever had PSA blood test                                                | C     | C     | C     | C     | C      | C      | C      | C     | C     | C     | C     | C     | 12 (100%)                             |
| HS_PSA_LAST                                                                      | Last PSA blood test                                                    | C     | C     | C     | C     | C      | C      | C      | C     | C     | C     | C     | C     | 12 (100%)                             |

Appendix 2 (as supplied by the authors): Harmonization potential of the Health and Risk Factor Questionnaire variables (Version 2.0 - Oct. 2017)

| Variable                                                                         | label                                                                 | ATL-1       | ATL-2       | ATP-1       | ATP-2       | BCGP-1      | BCGP-2      | BCGP-3      | CAG-1       | CAG-2       | OHS-1       | OHS-2       | OHS-3       | Variable with a complete status n (%) |
|----------------------------------------------------------------------------------|-----------------------------------------------------------------------|-------------|-------------|-------------|-------------|-------------|-------------|-------------|-------------|-------------|-------------|-------------|-------------|---------------------------------------|
| <b>Non pharmacological interventions-Radiological intervention</b>               |                                                                       |             |             |             |             |             |             |             |             |             |             |             |             |                                       |
| HS_MMGM_EVER                                                                     | Ever had mammography                                                  | C           | C           | C           | C           | C           | C           | C           | C           | C           | C           | C           | C           | 12 (100%)                             |
| HS_MMGM_LAST                                                                     | Last mammography                                                      | C           | C           | C           | C           | C           | C           | C           | C           | C           | C           | C           | C           | 12 (100%)                             |
| <b>Health community care utilization-Visit health professionals</b>              |                                                                       |             |             |             |             |             |             |             |             |             |             |             |             |                                       |
| HS_DENTAL_VISIT_EVER                                                             | Ever had dental professional visit                                    | C           | C           | C           | C           | C           | C           | C           | C           | C           | C           | C           | C           | 12 (100%)                             |
| HS_DENTAL_VISIT_LAST                                                             | Last visit with dental professional                                   | C           | C           | C           | C           | C           | C           | C           | C           | C           | C           | C           | C           | 12 (100%)                             |
| HS_ROUTINE_VISIT_EVER                                                            | Ever had routine medical check-up                                     | C           | C           | C           | C           | C           | C           | C           | C           | C           | C           | C           | C           | 12 (100%)                             |
| HS_ROUTINE_VISIT_LAST                                                            | Last routine medical check-up                                         | C           | C           | C           | C           | C           | C           | C           | C           | C           | C           | C           | C           | 12 (100%)                             |
| <b>Reproduction-Gravidity, pregnancy outcomes, parity and fertility</b>          |                                                                       |             |             |             |             |             |             |             |             |             |             |             |             |                                       |
| MH_CHILDREN_FATHERED                                                             | Number of children fathered                                           | C           | C           | C           | C           | C           | C           | C           | C           | I           | C           | C           | C           | 11 (91.7%)                            |
| MH_CHILDREN_FATHERED_CAT                                                         | Number of children fathered - categorical                             | C           | C           | C           | C           | C           | C           | C           | C           | C           | C           | C           | C           | 12 (100%)                             |
| WH_GRAVIDITY                                                                     | Gravidity                                                             | C           | C           | C           | C           | C           | C           | C           | C           | I           | C           | C           | C           | 11 (91.7%)                            |
| WH_GRAVIDITY_CAT                                                                 | Gravidity - categorical                                               | C           | C           | C           | C           | C           | C           | C           | C           | C           | C           | C           | C           | 12 (100%)                             |
| WH_LIVE_BIRTHS                                                                   | Number of live births mothered                                        | C           | C           | C           | C           | C           | C           | C           | C           | I           | C           | C           | C           | 11 (91.7%)                            |
| WH_LIVE_BIRTHS_CAT                                                               | Number of live births mothered - categorical                          | C           | C           | C           | C           | C           | C           | C           | C           | C           | C           | C           | C           | 12 (100%)                             |
| WH_PREG_20WK                                                                     | Number of pregnancies of at least 20 weeks                            | C           | C           | C           | C           | C           | C           | C           | C           | C           | C           | C           | C           | 12 (100%)                             |
| <b>Reproduction-Menstruation, menopause, andropause</b>                          |                                                                       |             |             |             |             |             |             |             |             |             |             |             |             |                                       |
| WH_HRT_AGE                                                                       | Age started using hormone replacement therapy                         | C           | C           | C           | C           | C           | C           | C           | C           | C           | C           | C           | C           | 12 (100%)                             |
| WH_HRT_DURATION                                                                  | Duration of use of hormone replacement therapy                        | C           | C           | C           | C           | C           | C           | C           | C           | C           | C           | C           | C           | 12 (100%)                             |
| WH_HFT_EVER                                                                      | Ever received hormone fertility treatment                             | C           | C           | C           | C           | C           | C           | C           | C           | C           | C           | C           | I           | 11 (91.7%)                            |
| WH_MENOPAUSE_AGE                                                                 | Age at menopause                                                      | C           | C           | C           | C           | C           | C           | C           | C           | C           | C           | C           | C           | 12 (100%)                             |
| WH_MENOPAUSE_EVER                                                                | Occurrence of menopause                                               | C           | C           | C           | C           | C           | C           | C           | C           | C           | C           | C           | C           | 12 (100%)                             |
| WH_MENOPAUSE_REASON                                                              | Menopause reason                                                      | C           | I           | I           | C           | C           | C           | I           | C           | I           | C           | C           | I           | 7 (58.3%)                             |
| WH_MENSTRUATION_AGE                                                              | Age at menarche                                                       | C           | C           | C           | C           | C           | C           | C           | C           | C           | C           | C           | C           | 12 (100%)                             |
| <b>Reproduction-Pregnancy delivery</b>                                           |                                                                       |             |             |             |             |             |             |             |             |             |             |             |             |                                       |
| WH_PREG_CUR                                                                      | Currently pregnant                                                    | C           | I           | I           | C           | C           | C           | I           | C           | C           | C           | C           | I           | 8 (66.7%)                             |
| WH_PREG_CUR_WK                                                                   | Number of weeks current pregnancy                                     | C           | I           | I           | C           | C           | C           | I           | C           | I           | C           | C           | I           | 7 (58.3%)                             |
| WH_PREG_FIRST_AGE                                                                | Age at first pregnancy                                                | C           | C           | C           | C           | C           | C           | C           | C           | C           | C           | C           | C           | 12 (100%)                             |
| WH_PREG_LAST_AGE                                                                 | Age at last pregnancy                                                 | C           | C           | C           | C           | C           | C           | C           | C           | C           | C           | C           | C           | 12 (100%)                             |
| <b>Reproduction-Contraception</b>                                                |                                                                       |             |             |             |             |             |             |             |             |             |             |             |             |                                       |
| WH_CONTRACEPTIVES_AGE                                                            | Age started using hormonal contraceptives                             | C           | C           | C           | C           | C           | C           | C           | C           | C           | C           | C           | C           | 12 (100%)                             |
| WH_CONTRACEPTIVES_DURATION                                                       | Duration of use of hormonal contraceptives                            | C           | C           | C           | C           | C           | C           | I           | C           | C           | C           | C           | I           | 10 (83.3%)                            |
| WH_CONTRACEPTIVES_EVER                                                           | Ever used hormonal contraceptives                                     | C           | C           | C           | C           | C           | C           | C           | C           | C           | C           | C           | C           | 12 (100%)                             |
| <b>Reproduction-Breastfeeding</b>                                                |                                                                       |             |             |             |             |             |             |             |             |             |             |             |             |                                       |
| WH_BREASTFEEDING_DURATION                                                        | Duration of breastfeeding                                             | C           | C           | C           | C           | C           | C           | C           | C           | C           | C           | I           | C           | 11 (91.7%)                            |
| <b>Reproduction-Reproductive sexual problems</b>                                 |                                                                       |             |             |             |             |             |             |             |             |             |             |             |             |                                       |
| WH_HRT_EVER                                                                      | Ever used hormone replacement therapy                                 | C           | C           | C           | C           | C           | C           | C           | C           | C           | C           | C           | C           | 12 (100%)                             |
| <b>Physical measures-Anthropometric measures</b>                                 |                                                                       |             |             |             |             |             |             |             |             |             |             |             |             |                                       |
| PM_BMI_SR                                                                        | Body mass index - self-reported                                       | C           | I           | I           | C           | C           | C           | I           | I           | C           | C           | C           | I           | 7 (58.3%)                             |
| PM_HIP_SR_AVG                                                                    | Average hip circumference - self-reported                             | C           | I           | I           | C           | C           | C           | I           | I           | C           | C           | C           | I           | 7 (58.3%)                             |
| PM_STAND_HEIGHT_SR_AVG                                                           | Average standing height - self-reported                               | C           | I           | I           | C           | C           | C           | I           | I           | C           | C           | C           | I           | 7 (58.3%)                             |
| PM_WAIST_HIP_RATIO_SR                                                            | Waist to hip ratio - self-reported                                    | C           | I           | I           | C           | C           | C           | I           | I           | C           | C           | C           | I           | 7 (58.3%)                             |
| PM_WAIST_SR_AVG                                                                  | Average waist circumference - self-reported                           | C           | I           | I           | C           | C           | C           | I           | I           | C           | C           | C           | I           | 7 (58.3%)                             |
| PM_WEIGHT_SR_AVG                                                                 | Average weight - self-reported                                        | C           | I           | I           | C           | C           | C           | I           | I           | C           | C           | C           | I           | 7 (58.3%)                             |
| <b>Physical measures-Physical characteristics</b>                                |                                                                       |             |             |             |             |             |             |             |             |             |             |             |             |                                       |
| PM_HANDEDNESS                                                                    | Handedness                                                            | C           | C           | I           | C           | C           | C           | I           | C           | C           | C           | C           | I           | 9 (75%)                               |
| UVE_EYE                                                                          | Natural eye colour                                                    | C           | I           | I           | C           | C           | C           | I           | I           | C           | C           | C           | I           | 7 (58.3%)                             |
| UVE_HAIR                                                                         | Natural hair color                                                    | C           | C           | C           | C           | C           | C           | C           | C           | C           | C           | C           | C           | 12 (100%)                             |
| <b>Physical environment-Chemical exposure</b>                                    |                                                                       |             |             |             |             |             |             |             |             |             |             |             |             |                                       |
| PSE_ADULT_HOME_DURATION                                                          | Duration of passive smoking exposure during adulthood at home         | C           | C           | C           | C           | C           | C           | C           | C           | C           | C           | C           | C           | 12 (100%)                             |
| PSE_ADULT_WRK_DURATION                                                           | Duration of passive smoking exposure during adulthood at work         | C           | C           | C           | C           | C           | C           | C           | C           | C           | C           | C           | C           | 12 (100%)                             |
| PSE_CHILDHOOD_DURATION                                                           | Duration of passive smoking exposure during childhood                 | C           | C           | C           | C           | C           | C           | C           | C           | C           | C           | C           | C           | 12 (100%)                             |
| PSE_HOME_FREQ                                                                    | Frequency of usual passive smoking exposure at home                   | C           | C           | C           | C           | C           | C           | C           | C           | C           | C           | C           | C           | 12 (100%)                             |
| PSE_LEISURE_FREQ                                                                 | Frequency of usual passive smoking exposure during leisure activities | C           | C           | C           | C           | C           | C           | C           | C           | C           | C           | C           | C           | 12 (100%)                             |
| PSE_WRK_FREQ                                                                     | Frequency of usual passive smoking exposure at work                   | C           | C           | C           | C           | C           | C           | C           | C           | C           | C           | C           | C           | 12 (100%)                             |
| <b>Physical environment-Radiation exposure</b>                                   |                                                                       |             |             |             |             |             |             |             |             |             |             |             |             |                                       |
| UVE_PROTECTION                                                                   | Use of sun protection                                                 | I           | C           | C           | I           | I           | I           | C           | C           | C           | I           | I           | I           | 5 (41.7%)                             |
| UVE_SKIN_REACTION                                                                | Skin reaction to the sun                                              | C           | C           | C           | C           | C           | C           | C           | C           | C           | C           | C           | C           | 12 (100%)                             |
| UVE_TANNING_CUR                                                                  | Current use of artificial tanning equipment                           | C           | C           | C           | C           | C           | C           | I           | C           | C           | C           | C           | C           | 11 (91.7%)                            |
| UVE_TIME_WKDAY                                                                   | Time spent in the sun on typical weekdays                             | I           | C           | C           | I           | I           | I           | C           | C           | C           | I           | I           | C           | 6 (50%)                               |
| UVE_TIME_WKEND                                                                   | Time spent in the sun on typical weekend days                         | I           | C           | C           | I           | I           | I           | C           | C           | C           | I           | I           | C           | 6 (50%)                               |
| <b>Administrative information-Physical measure biosample related information</b> |                                                                       |             |             |             |             |             |             |             |             |             |             |             |             |                                       |
| PM_ABLE_STAND                                                                    | Able to stand                                                         | C           | I           | I           | C           | C           | C           | I           | C           | C           | C           | C           | I           | 8 (66.7%)                             |
| <b>Administrative information-Questionnaire interview related information</b>    |                                                                       |             |             |             |             |             |             |             |             |             |             |             |             |                                       |
| ADM_QX_FORMAT                                                                    | Questionnaire administration format                                   | C           | C           | C           | C           | C           | C           | C           | C           | C           | C           | C           | C           | 12 (100%)                             |
| ADM_QX_LANGUAGE                                                                  | Questionnaire administration language                                 | C           | C           | C           | C           | C           | C           | C           | C           | C           | C           | C           | C           | 12 (100%)                             |
| ADM_QX_VERSION                                                                   | Questionnaire version                                                 | C           | C           | C           | C           | C           | C           | C           | C           | C           | C           | C           | C           | 12 (100%)                             |
| ADM_STUDY_DATASET                                                                | Regional cohort dataset name                                          | C           | C           | C           | C           | C           | C           | C           | C           | C           | C           | C           | C           | 12 (100%)                             |
| PA_IPAQ_VERSION                                                                  | IPAQ version                                                          | C           | C           | C           | C           | C           | C           | C           | C           | C           | C           | C           | C           | 12 (100%)                             |
| <b>Administrative information-Identifiers</b>                                    |                                                                       |             |             |             |             |             |             |             |             |             |             |             |             |                                       |
| ADM_FSA                                                                          | Forward Sortation Area (FSA)                                          | C           | C           | C           | C           | C           | C           | C           | C           | C           | C           | C           | C           | 12 (100%)                             |
| ADM_STUDY_ID                                                                     | Regional cohort ID                                                    | C           | C           | C           | C           | C           | C           | C           | C           | C           | C           | C           | C           | 12 (100%)                             |
| <b>Administrative information-Date and time related information</b>              |                                                                       |             |             |             |             |             |             |             |             |             |             |             |             |                                       |
| ADM_QX_COMPLETION                                                                | Date of questionnaire completion                                      | C           | C           | C           | C           | C           | C           | C           | C           | C           | C           | C           | C           | 12 (100%)                             |
| Total complete status n(%)                                                       |                                                                       | 629 (90.6%) | 322 (46.4%) | 488 (70.3%) | 631 (90.9%) | 627 (90.3%) | 631 (90.9%) | 533 (76.8%) | 504 (72.6%) | 613 (88.3%) | 629 (90.6%) | 652 (93.9%) | 540 (77.8%) | 6799 (81.6%)                          |
| Total incomplete status n(%)                                                     |                                                                       | 65 (9.4%)   | 372 (53.6%) | 206 (29.7%) | 63 (9.1%)   | 67 (9.7%)   | 63 (9.1%)   | 161 (23.2%) | 190 (27.4%) | 81 (11.7%)  | 65 (9.4%)   | 42 (6.1%)   | 154 (22.2%) | 1529 (18.4%)                          |
| Note : Complete : C ; Incomplete: I                                              |                                                                       |             |             |             |             |             |             |             |             |             |             |             |             |                                       |
